# Supplementary material
Source: PubMed Central journal article supplement (PMC6556174)
Supplement: NIHMS1032517-supplement-2.pdf [file NIHMS1032517-supplement-2.pdf]

# Identifiers

Study ID

---

# ECG File

---

---

## Main ECG

ECG File number

\_\_\_\_\_

Is the patient paced during this electrocardiogram?

No  Yes  Unknown

ECG Acquisition Date

\_\_\_\_\_

---

---

## Second ECG

ECG File number

\_\_\_\_\_

Is the patient paced during this electrocardiogram?

No  Yes  Unknown

ECG Acquisition Date

\_\_\_\_\_

# Blinding Identifiers

First Name

---

Last Name

---

Middle Initial

---

Date of Birth

---

# Subject Status

Is the subject alive at time of data entry?

- Yes
- No

Date of death?

---

Cause of death?

---

(brief explanation)

# Demographics

Sex

- Male
- Female

Race

- White
- Black
- Asian
- Native American
- Hispanic

# Inclusion And Exclusion Criteria

---

---

## Inclusion Criteria

**-ICD/CRT-D implanted for primary prevention**

**-Collected pre-implant (digitized) 12-Lead ECG**

Meets Inclusion Criteria?

- Yes
- No

---

---

## Exclusion Criteria

**-Inherited cardiomyopathies and channelopathies**

**-Congenital heart disease**

**-ICD implanted for secondary prevention**

Absent Exclusion Criteria?

- Yes
- No

# Baseline Clinical Data Pre-Implant

**Document clinical data to temporally agree with patient status at time before implant or generator change. E.g. If the patient has their first MI between de novo implant and generator change/upgrade, you would answer "No" for "History of MI" at the baseline clinical data timepoint and "Yes" during concordant timeframe.**

|                                                  |                                                                                                                                                                                                                                                                             |
|--------------------------------------------------|-----------------------------------------------------------------------------------------------------------------------------------------------------------------------------------------------------------------------------------------------------------------------------|
| History of MI                                    | <input type="radio"/> Yes<br><input type="radio"/> No                                                                                                                                                                                                                       |
| History of Revascularization                     | <input type="radio"/> Yes<br><input type="radio"/> No                                                                                                                                                                                                                       |
| Type of Revascularization                        | <input type="checkbox"/> CABG<br><input type="checkbox"/> PTCA                                                                                                                                                                                                              |
| Hypertension                                     | <input type="radio"/> Yes<br><input type="radio"/> No                                                                                                                                                                                                                       |
| Diabetes                                         | <input type="radio"/> Yes<br><input type="radio"/> No                                                                                                                                                                                                                       |
| Atrial Fibrillation                              | <input type="radio"/> Yes<br><input type="radio"/> No                                                                                                                                                                                                                       |
| History of Stroke                                | <input type="radio"/> Yes<br><input type="radio"/> No                                                                                                                                                                                                                       |
| Use Anti-arrhythmic Drugs                        | <input type="radio"/> Yes<br><input type="radio"/> No                                                                                                                                                                                                                       |
| Type of AAD                                      | <input type="checkbox"/> Amiodarone<br><input type="checkbox"/> Dronedarone<br><input type="checkbox"/> Propafenone<br><input type="checkbox"/> Sotalol<br><input type="checkbox"/> Other                                                                                   |
| Use Beta Blockers                                | <input type="radio"/> Yes<br><input type="radio"/> No                                                                                                                                                                                                                       |
| RAAS Modifying Medications                       | <input type="checkbox"/> No medications<br><input type="checkbox"/> ACE inhibitor use<br><input type="checkbox"/> ARB use<br><input type="checkbox"/> ARNI (Angiotensin II Receptor Blocker Neprilysin Inhibitor) use<br><input type="checkbox"/> Aldosterone Inhibitor Use |
| Use Calcium Channel Blockers                     | <input type="radio"/> Yes<br><input type="radio"/> No                                                                                                                                                                                                                       |
| BUN (mg/dL)                                      | _____                                                                                                                                                                                                                                                                       |
| Creatinine (mg/dL)                               | _____                                                                                                                                                                                                                                                                       |
| Baseline NYHA (New York Heart Association) Class | <input type="radio"/> I<br><input type="radio"/> II<br><input type="radio"/> III<br><input type="radio"/> IV                                                                                                                                                                |

Baseline LVEF

- >55%
- 50-55%
- 45-50%
- 40-45%
- 35-40%
- 30-35%
- 25-30%
- 20-25%
- 15-20%
- 10-15%
- < 10%

Exact LVEF (if known)

---

Date of Echocardiogram

---



# Implantation Data

---

---

## Device Data

ICD/CRT-D Indication

- Primary Prevention  
 Secondary Prevention  
(Subject screen fails if indicated for secondary prevention)

Date of Baseline (pre-implant) 12-Lead ECG

\_\_\_\_\_

Date of ICD/CRT-D Implant

\_\_\_\_\_

ICD Type

- Single-chamber  
 Dual-chamber  
 CRT-D  
 S-ICD

LV Lead Positioning

- Apical  
 Mid  
 Basal

LV Lead Positioning

- Anterior  
 Anterolateral  
 Posterior  
 Posterolateral

Device Manufacturer

- Medtronic  
 Boston Scientific  
 St Jude  
 Biotronik

Device Model

\_\_\_\_\_

VT Detection Zone Programmed?

- Yes  
 No

Device ATP Setting

- On  
 Off

Device VT Zone (BPM)

\_\_\_\_\_  
(Please list the lowest integer of the VT zone.  
E.g. if range is 188-200 bpm enter in 188)

Device VF Zone (BPM)

\_\_\_\_\_  
(Please list the lowest integer of the VF zone.  
E.g. if range is 188-200 bpm enter in 188)

---

---

**If Milliseconds is Reported Instead**

Device VT Interval (ms) \_\_\_\_\_

Device VF Interval (ms) \_\_\_\_\_

---

---

**If Programmed for Number of Intervals to Detect (NID)**Device NID for VT \_\_\_\_\_  
(Optional if listed on report)Device NID for Redetection VT \_\_\_\_\_  
(Optional if listed on report)Device NID VF Numerator \_\_\_\_\_  
(Optional if listed on report)Device NID VF Denominator \_\_\_\_\_  
(Optional if listed on report)

---

---

**If Programmed for Detection Duration****Example****Initial Duration: 2.5 seconds****Redetection Duration: 1.0 seconds**Device Initial Detection Duration for VT \_\_\_\_\_  
(Optional if listed on report)Device Re-detection Duration for VT \_\_\_\_\_  
(Optional if listed on report)Device Initial Detection Duration for VF \_\_\_\_\_  
(Optional if listed on report)Device Redetection Duration for VF \_\_\_\_\_  
(Optional if listed on report)

# Events Status-Post Implant

---

---

## Events

Therapy During Device Life?

- Yes  
 No

Date of Therapy

\_\_\_\_\_

% Atrial Pacing at Date of Therapy

\_\_\_\_\_

% Ventricular Pacing at Date of Therapy

\_\_\_\_\_

% Left Ventricular Pacing at Date of Therapy

\_\_\_\_\_

Charge Time at Date of Therapy

\_\_\_\_\_

((seconds))

Type of Therapy

- Shock (Joules)  
 ATP

Total Amount of Joules Delivered

\_\_\_\_\_

(Please calculate total amount of joules. E.g. if interrogation lists 41 J x 4, then enter 164 into this box )

Total Frequency of Shocks Delivered During Therapy

\_\_\_\_\_

(Do not include ATP in this sum)

Adjudication of Therapy

- Appropriate  
 Inappropriate

Programming Changes After Therapy

- Yes  
 No

Type of Ventricular Arrhythmia

- Monomorphic VT  
 Polymorphic VT / Ventricular Fibrillation

Average Cycle Length of Arrhythmia (ms)

\_\_\_\_\_

# Pre-Generator Change or Device Upgrade Clinical Data

**Document clinical data to temporally agree with patient status at time before implant or generator change. E.g. If the patient has their first MI between de novo implant and generator change/upgrade, you would answer "No" for "History of MI" at the baseline clinical data timepoint and "Yes" during concordant timeframe.**

|                                                                           |                                                                                                                                                                                                                                                                             |
|---------------------------------------------------------------------------|-----------------------------------------------------------------------------------------------------------------------------------------------------------------------------------------------------------------------------------------------------------------------------|
| History of MI                                                             | <input type="radio"/> Yes<br><input type="radio"/> No                                                                                                                                                                                                                       |
| History of Revascularization                                              | <input type="radio"/> Yes<br><input type="radio"/> No                                                                                                                                                                                                                       |
| Type of Revascularization                                                 | <input type="checkbox"/> CABG<br><input type="checkbox"/> PTCA                                                                                                                                                                                                              |
| Hypertension                                                              | <input type="radio"/> Yes<br><input type="radio"/> No                                                                                                                                                                                                                       |
| Diabetes                                                                  | <input type="radio"/> Yes<br><input type="radio"/> No                                                                                                                                                                                                                       |
| Atrial Fibrillation                                                       | <input type="radio"/> Yes<br><input type="radio"/> No                                                                                                                                                                                                                       |
| History of Stroke                                                         | <input type="radio"/> Yes<br><input type="radio"/> No                                                                                                                                                                                                                       |
| Use Anti-arrhythmic Drugs                                                 | <input type="radio"/> Yes<br><input type="radio"/> No                                                                                                                                                                                                                       |
| Type of AAD                                                               | <input type="checkbox"/> Amiodarone<br><input type="checkbox"/> Dronedarone<br><input type="checkbox"/> Propafenone<br><input type="checkbox"/> Sotalol<br><input type="checkbox"/> Other                                                                                   |
| Use Beta Blockers                                                         | <input type="radio"/> Yes<br><input type="radio"/> No                                                                                                                                                                                                                       |
| RAAS Modifying Medications                                                | <input type="checkbox"/> No medications<br><input type="checkbox"/> ACE inhibitor use<br><input type="checkbox"/> ARB use<br><input type="checkbox"/> ARNI (Angiotensin II Receptor Blocker Neprilysin Inhibitor) use<br><input type="checkbox"/> Aldosterone Inhibitor Use |
| Use Calcium Channel Blockers                                              | <input type="radio"/> Yes<br><input type="radio"/> No                                                                                                                                                                                                                       |
| BUN (mg/dL)                                                               | _____                                                                                                                                                                                                                                                                       |
| Creatinine (mg/dL)                                                        | _____                                                                                                                                                                                                                                                                       |
| NYHA (New York Heart Association) Class Prior to Generator Change/Upgrade | <input type="radio"/> I<br><input type="radio"/> II<br><input type="radio"/> III<br><input type="radio"/> IV                                                                                                                                                                |

LVEF Prior to Generator Change/Upgrade

- >55%
- 50-55%
- 45-50%
- 40-45%
- 35-40%
- 30-35%
- 25-30%
- 20-25%
- 15-20%
- 10-15%
- < 10%

Exact LVEF (if known - e.g. Biplane Simpson's Method)

---

Date of Echocardiogram

---

# Generator Change or Device Upgrade

---



---

## Device Data

Date of Pre-Generator Change 12-Lead ECG

\_\_\_\_\_

Date of Generator Change or Upgrade

\_\_\_\_\_

ICD Type

- Single-chamber  
 Dual-chamber  
 CRT-D  
 S-ICD  
 Downgrade to Pacemaker

LV Lead Positioning

- Apical  
 Mid  
 Basal

LV Lead Positioning

- Anterior  
 Anterolateral  
 Posterior  
 Posterolateral

Device Manufacturer

- Medtronic  
 Boston Scientific  
 St Jude  
 Biotronik

Device Model

\_\_\_\_\_

VT Detection Zone Programmed?

- Yes  
 No

Device ATP Setting

- On  
 Off

Device VT Zone (BPM)

\_\_\_\_\_  
 (Please list the lowest integer of the VT zone.  
 E.g. if range is 188-200 bpm enter in 188)

Device VF Zone (BPM)

\_\_\_\_\_  
 (Please list the lowest integer of the VF zone.  
 E.g. if range is 188-200 bpm enter in 188)

---



---

## If Milliseconds is Reported Instead

Device VT Interval (ms)

\_\_\_\_\_

Device VF Interval (ms)

\_\_\_\_\_

---

---

**If Programmed for Number of Intervals to Detect (NID)**

Device NID for VT \_\_\_\_\_  
(Optional if listed on report)

Device NID for Redetection VT \_\_\_\_\_  
(Optional if listed on report)

Device NID VF Numerator \_\_\_\_\_  
(Optional if listed on report)

Device NID VF Denominator \_\_\_\_\_  
(Optional if listed on report)

---

---

**If Programmed for Detection Duration**

**Example**

**Initial Duration: 2.5 seconds**

**Redetection Duration: 1.0 seconds**

Device Initial Detection Duration for VT \_\_\_\_\_  
(Optional if listed on report)

Device Re-detection Duration for VT \_\_\_\_\_  
(Optional if listed on report)

Device Initial Detection Duration for VF \_\_\_\_\_  
(Optional if listed on report)

Device Redetection Duration for VF \_\_\_\_\_  
(Optional if listed on report)

# Events Status-Post Generator Change or Device Upgrade

---

---

## Events

Therapy During Device Life?

- Yes  
 No

Date of Therapy

\_\_\_\_\_

% Atrial Pacing at Date of Therapy

\_\_\_\_\_

% Ventricular Pacing at Date of Therapy

\_\_\_\_\_

% Left Ventricular Pacing at Date of Therapy

\_\_\_\_\_

Charge Time at Date of Therapy

\_\_\_\_\_

(seconds)

Type of Therapy

- Shock (Joules)  
 ATP

Total Amount of Joules Delivered

\_\_\_\_\_  
(Please calculate total amount of joules. E.g. if interrogation lists 41 J x 4, then enter 164 into this box )

Total Frequency of Shocks Delivered During Therapy

\_\_\_\_\_  
(Do not include ATP in this sum)

Adjudication of Therapy

- Appropriate  
 Inappropriate

Programming Changes After Therapy

- Yes  
 No

Type of Ventricular Arrhythmia

- Monomorphic VT  
 Polymorphic VT / Ventricular Fibrillation

Average Cycle Length of Arrhythmia (ms)

\_\_\_\_\_
