# Supplementary material
Source: PubMed Central journal article supplement (PMC6556174)
Supplement: NIHMS1032517-supplement-3.pdf [file NIHMS1032517-supplement-3.pdf]

# OCTRI 6073 Global electrical heterogeneity and clinical outcomes

[Codebook ▾](#)

## Data Dictionary Codebook

12/28/2017 10:46am

| #                                            | Variable / Field Name | Field Label<br><i>Field Note</i>                     | Field Attributes (Field Type, Validation, Choices, Calculations, etc.)                                                                                                   |   |            |   |            |   |          |
|----------------------------------------------|-----------------------|------------------------------------------------------|--------------------------------------------------------------------------------------------------------------------------------------------------------------------------|---|------------|---|------------|---|----------|
| Instrument: <b>Identifiers</b> (identifiers) |                       |                                                      |                                                                                                                                                                          |   |            |   |            |   |          |
| 1                                            | study_id              | Study ID                                             | text, Required                                                                                                                                                           |   |            |   |            |   |          |
| 2                                            | identifiers_complete  | Section Header: <i>Form Status</i><br>Complete?      | dropdown<br><table border="1"> <tr> <td>0</td> <td>Incomplete</td> </tr> <tr> <td>1</td> <td>Unverified</td> </tr> <tr> <td>2</td> <td>Complete</td> </tr> </table>      | 0 | Incomplete | 1 | Unverified | 2 | Complete |
| 0                                            | Incomplete            |                                                      |                                                                                                                                                                          |   |            |   |            |   |          |
| 1                                            | Unverified            |                                                      |                                                                                                                                                                          |   |            |   |            |   |          |
| 2                                            | Complete              |                                                      |                                                                                                                                                                          |   |            |   |            |   |          |
| Instrument: <b>ECG File</b> (ecg_file)       |                       |                                                      |                                                                                                                                                                          |   |            |   |            |   |          |
| 3                                            | ecg_fileno            | Section Header: <i>Main ECG</i><br>ECG File number   | text<br>Custom alignment: LH                                                                                                                                             |   |            |   |            |   |          |
| 4                                            | ecg_filepacing        | Is the patient paced during this electrocardiogram?  | radio<br><table border="1"> <tr> <td>0</td> <td>No</td> </tr> <tr> <td>1</td> <td>Yes</td> </tr> <tr> <td>2</td> <td>Unknown</td> </tr> </table><br>Custom alignment: LH | 0 | No         | 1 | Yes        | 2 | Unknown  |
| 0                                            | No                    |                                                      |                                                                                                                                                                          |   |            |   |            |   |          |
| 1                                            | Yes                   |                                                      |                                                                                                                                                                          |   |            |   |            |   |          |
| 2                                            | Unknown               |                                                      |                                                                                                                                                                          |   |            |   |            |   |          |
| 5                                            | ecg_filedate          | ECG Acquisition Date                                 | text (date_mdy)<br>Custom alignment: LH                                                                                                                                  |   |            |   |            |   |          |
| 6                                            | ecg_fileno_2          | Section Header: <i>Second ECG</i><br>ECG File number | text<br>Custom alignment: LH                                                                                                                                             |   |            |   |            |   |          |
| 7                                            | ecg_filepacing_2      | Is the patient paced during this electrocardiogram?  | radio<br><table border="1"> <tr> <td>0</td> <td>No</td> </tr> <tr> <td>1</td> <td>Yes</td> </tr> <tr> <td>2</td> <td>Unknown</td> </tr> </table><br>Custom alignment: LH | 0 | No         | 1 | Yes        | 2 | Unknown  |
| 0                                            | No                    |                                                      |                                                                                                                                                                          |   |            |   |            |   |          |
| 1                                            | Yes                   |                                                      |                                                                                                                                                                          |   |            |   |            |   |          |
| 2                                            | Unknown               |                                                      |                                                                                                                                                                          |   |            |   |            |   |          |
| 8                                            | ecg_filedate_2        | ECG Acquisition Date                                 | text (date_mdy)<br>Custom alignment: LH                                                                                                                                  |   |            |   |            |   |          |

|                                                                |                                                            |                                                 |                                                                                                                                                            |   |            |   |            |   |          |
|----------------------------------------------------------------|------------------------------------------------------------|-------------------------------------------------|------------------------------------------------------------------------------------------------------------------------------------------------------------|---|------------|---|------------|---|----------|
| 9                                                              | ecg_file_complete                                          | Section Header: <i>Form Status</i><br>Complete? | dropdown<br><table border="1"> <tr><td>0</td><td>Incomplete</td></tr> <tr><td>1</td><td>Unverified</td></tr> <tr><td>2</td><td>Complete</td></tr> </table> | 0 | Incomplete | 1 | Unverified | 2 | Complete |
| 0                                                              | Incomplete                                                 |                                                 |                                                                                                                                                            |   |            |   |            |   |          |
| 1                                                              | Unverified                                                 |                                                 |                                                                                                                                                            |   |            |   |            |   |          |
| 2                                                              | Complete                                                   |                                                 |                                                                                                                                                            |   |            |   |            |   |          |
| Instrument: <b>Blinding Identifiers</b> (blinding_identifiers) |                                                            |                                                 |                                                                                                                                                            |   |            |   |            |   |          |
| 10                                                             | first_name                                                 | First Name                                      | text, Required, Identifier                                                                                                                                 |   |            |   |            |   |          |
| 11                                                             | last_name                                                  | Last Name                                       | text, Required, Identifier                                                                                                                                 |   |            |   |            |   |          |
| 12                                                             | middle_initial                                             | Middle Initial                                  | text, Required, Identifier                                                                                                                                 |   |            |   |            |   |          |
| 13                                                             | dob                                                        | Date of Birth                                   | text (date_mdy), Required, Identifier                                                                                                                      |   |            |   |            |   |          |
| 14                                                             | blinding_identifiers_complete                              | Section Header: <i>Form Status</i><br>Complete? | dropdown<br><table border="1"> <tr><td>0</td><td>Incomplete</td></tr> <tr><td>1</td><td>Unverified</td></tr> <tr><td>2</td><td>Complete</td></tr> </table> | 0 | Incomplete | 1 | Unverified | 2 | Complete |
| 0                                                              | Incomplete                                                 |                                                 |                                                                                                                                                            |   |            |   |            |   |          |
| 1                                                              | Unverified                                                 |                                                 |                                                                                                                                                            |   |            |   |            |   |          |
| 2                                                              | Complete                                                   |                                                 |                                                                                                                                                            |   |            |   |            |   |          |
| Instrument: <b>Subject Status</b> (subject_status)             |                                                            |                                                 |                                                                                                                                                            |   |            |   |            |   |          |
| 15                                                             | alive                                                      | Is the subject alive at time of data entry?     | radio, Required<br><table border="1"> <tr><td>1</td><td>Yes</td></tr> <tr><td>2</td><td>No</td></tr> </table>                                              | 1 | Yes        | 2 | No         |   |          |
| 1                                                              | Yes                                                        |                                                 |                                                                                                                                                            |   |            |   |            |   |          |
| 2                                                              | No                                                         |                                                 |                                                                                                                                                            |   |            |   |            |   |          |
| 16                                                             | death_date<br>Show the field ONLY if:<br>[alive] = '2'     | Date of death?                                  | text (date_mdy)                                                                                                                                            |   |            |   |            |   |          |
| 17                                                             | cause_of_death<br>Show the field ONLY if:<br>[alive] = '2' | Cause of death?<br><i>brief explanation</i>     | notes                                                                                                                                                      |   |            |   |            |   |          |
| 18                                                             | subject_status_complete                                    | Section Header: <i>Form Status</i><br>Complete? | dropdown<br><table border="1"> <tr><td>0</td><td>Incomplete</td></tr> <tr><td>1</td><td>Unverified</td></tr> <tr><td>2</td><td>Complete</td></tr> </table> | 0 | Incomplete | 1 | Unverified | 2 | Complete |
| 0                                                              | Incomplete                                                 |                                                 |                                                                                                                                                            |   |            |   |            |   |          |
| 1                                                              | Unverified                                                 |                                                 |                                                                                                                                                            |   |            |   |            |   |          |
| 2                                                              | Complete                                                   |                                                 |                                                                                                                                                            |   |            |   |            |   |          |
| Instrument: <b>Demographics</b> (demographics)                 |                                                            |                                                 |                                                                                                                                                            |   |            |   |            |   |          |
| 19                                                             | sex                                                        | Sex                                             | radio, Required<br><table border="1"> <tr><td>1</td><td>Male</td></tr> <tr><td>2</td><td>Female</td></tr> </table>                                         | 1 | Male       | 2 | Female     |   |          |
| 1                                                              | Male                                                       |                                                 |                                                                                                                                                            |   |            |   |            |   |          |
| 2                                                              | Female                                                     |                                                 |                                                                                                                                                            |   |            |   |            |   |          |

|                                                                                           |                                                                     |                                                                                                                                                                                                                                                                                                                                                                          |                                                                                                                                                                                                                                       |   |                |      |            |                |          |   |                 |   |          |
|-------------------------------------------------------------------------------------------|---------------------------------------------------------------------|--------------------------------------------------------------------------------------------------------------------------------------------------------------------------------------------------------------------------------------------------------------------------------------------------------------------------------------------------------------------------|---------------------------------------------------------------------------------------------------------------------------------------------------------------------------------------------------------------------------------------|---|----------------|------|------------|----------------|----------|---|-----------------|---|----------|
| 20                                                                                        | race                                                                | Race                                                                                                                                                                                                                                                                                                                                                                     | radio, Required<br><table border="1"> <tr><td>1</td><td>White</td></tr> <tr><td>2</td><td>Black</td></tr> <tr><td>3</td><td>Asian</td></tr> <tr><td>4</td><td>Native American</td></tr> <tr><td>5</td><td>Hispanic</td></tr> </table> | 1 | White          | 2    | Black      | 3              | Asian    | 4 | Native American | 5 | Hispanic |
| 1                                                                                         | White                                                               |                                                                                                                                                                                                                                                                                                                                                                          |                                                                                                                                                                                                                                       |   |                |      |            |                |          |   |                 |   |          |
| 2                                                                                         | Black                                                               |                                                                                                                                                                                                                                                                                                                                                                          |                                                                                                                                                                                                                                       |   |                |      |            |                |          |   |                 |   |          |
| 3                                                                                         | Asian                                                               |                                                                                                                                                                                                                                                                                                                                                                          |                                                                                                                                                                                                                                       |   |                |      |            |                |          |   |                 |   |          |
| 4                                                                                         | Native American                                                     |                                                                                                                                                                                                                                                                                                                                                                          |                                                                                                                                                                                                                                       |   |                |      |            |                |          |   |                 |   |          |
| 5                                                                                         | Hispanic                                                            |                                                                                                                                                                                                                                                                                                                                                                          |                                                                                                                                                                                                                                       |   |                |      |            |                |          |   |                 |   |          |
| 21                                                                                        | demographics_complete                                               | Section Header: <i>Form Status</i><br>Complete?                                                                                                                                                                                                                                                                                                                          | dropdown<br><table border="1"> <tr><td>0</td><td>Incomplete</td></tr> <tr><td>1</td><td>Unverified</td></tr> <tr><td>2</td><td>Complete</td></tr> </table>                                                                            | 0 | Incomplete     | 1    | Unverified | 2              | Complete |   |                 |   |          |
| 0                                                                                         | Incomplete                                                          |                                                                                                                                                                                                                                                                                                                                                                          |                                                                                                                                                                                                                                       |   |                |      |            |                |          |   |                 |   |          |
| 1                                                                                         | Unverified                                                          |                                                                                                                                                                                                                                                                                                                                                                          |                                                                                                                                                                                                                                       |   |                |      |            |                |          |   |                 |   |          |
| 2                                                                                         | Complete                                                            |                                                                                                                                                                                                                                                                                                                                                                          |                                                                                                                                                                                                                                       |   |                |      |            |                |          |   |                 |   |          |
| Instrument: <b>Inclusion And Exclusion Criteria</b> (inclusion_and_exclusion_criteria)    |                                                                     |                                                                                                                                                                                                                                                                                                                                                                          |                                                                                                                                                                                                                                       |   |                |      |            |                |          |   |                 |   |          |
| 22                                                                                        | inclusion                                                           | Section Header: <i>Inclusion Criteria -ICD/CRT-D implanted for primary prevention -Collected pre-implant (digitized) 12-Lead ECG</i><br>Meets Inclusion Criteria?                                                                                                                                                                                                        | radio, Required<br><table border="1"> <tr><td>1</td><td>Yes</td></tr> <tr><td>2</td><td>No</td></tr> </table>                                                                                                                         | 1 | Yes            | 2    | No         |                |          |   |                 |   |          |
| 1                                                                                         | Yes                                                                 |                                                                                                                                                                                                                                                                                                                                                                          |                                                                                                                                                                                                                                       |   |                |      |            |                |          |   |                 |   |          |
| 2                                                                                         | No                                                                  |                                                                                                                                                                                                                                                                                                                                                                          |                                                                                                                                                                                                                                       |   |                |      |            |                |          |   |                 |   |          |
| 23                                                                                        | exclusion                                                           | Section Header: <i>Exclusion Criteriae -Inherited cardiomyopathies and channelopathies -Congenital heart disease -ICD implanted for secondary prevention</i><br>Absent Exclusion Criteria?                                                                                                                                                                               | radio, Required<br><table border="1"> <tr><td>1</td><td>Yes</td></tr> <tr><td>2</td><td>No</td></tr> </table>                                                                                                                         | 1 | Yes            | 2    | No         |                |          |   |                 |   |          |
| 1                                                                                         | Yes                                                                 |                                                                                                                                                                                                                                                                                                                                                                          |                                                                                                                                                                                                                                       |   |                |      |            |                |          |   |                 |   |          |
| 2                                                                                         | No                                                                  |                                                                                                                                                                                                                                                                                                                                                                          |                                                                                                                                                                                                                                       |   |                |      |            |                |          |   |                 |   |          |
| 24                                                                                        | inclusion_and_exclusion_criteria_complete                           | Section Header: <i>Form Status</i><br>Complete?                                                                                                                                                                                                                                                                                                                          | dropdown<br><table border="1"> <tr><td>0</td><td>Incomplete</td></tr> <tr><td>1</td><td>Unverified</td></tr> <tr><td>2</td><td>Complete</td></tr> </table>                                                                            | 0 | Incomplete     | 1    | Unverified | 2              | Complete |   |                 |   |          |
| 0                                                                                         | Incomplete                                                          |                                                                                                                                                                                                                                                                                                                                                                          |                                                                                                                                                                                                                                       |   |                |      |            |                |          |   |                 |   |          |
| 1                                                                                         | Unverified                                                          |                                                                                                                                                                                                                                                                                                                                                                          |                                                                                                                                                                                                                                       |   |                |      |            |                |          |   |                 |   |          |
| 2                                                                                         | Complete                                                            |                                                                                                                                                                                                                                                                                                                                                                          |                                                                                                                                                                                                                                       |   |                |      |            |                |          |   |                 |   |          |
| Instrument: <b>Baseline Clinical Data Pre-Implant</b> (baseline_clinical_data_preimplant) |                                                                     |                                                                                                                                                                                                                                                                                                                                                                          |                                                                                                                                                                                                                                       |   |                |      |            |                |          |   |                 |   |          |
| 25                                                                                        | mi                                                                  | Section Header: <i>Document clinical data to temporally agree with patient status at time before implant or generator change. E.g. If the patient has their first MI between de novo implant and generator change/upgrade, you would answer "No" for "History of MI" at the baseline clinical data timepoint and "Yes" during concordant timeframe.</i><br>History of MI | radio, Required<br><table border="1"> <tr><td>1</td><td>Yes</td></tr> <tr><td>2</td><td>No</td></tr> </table>                                                                                                                         | 1 | Yes            | 2    | No         |                |          |   |                 |   |          |
| 1                                                                                         | Yes                                                                 |                                                                                                                                                                                                                                                                                                                                                                          |                                                                                                                                                                                                                                       |   |                |      |            |                |          |   |                 |   |          |
| 2                                                                                         | No                                                                  |                                                                                                                                                                                                                                                                                                                                                                          |                                                                                                                                                                                                                                       |   |                |      |            |                |          |   |                 |   |          |
| 26                                                                                        | revascularization                                                   | History of Revascularization                                                                                                                                                                                                                                                                                                                                             | radio, Required<br><table border="1"> <tr><td>1</td><td>Yes</td></tr> <tr><td>2</td><td>No</td></tr> </table>                                                                                                                         | 1 | Yes            | 2    | No         |                |          |   |                 |   |          |
| 1                                                                                         | Yes                                                                 |                                                                                                                                                                                                                                                                                                                                                                          |                                                                                                                                                                                                                                       |   |                |      |            |                |          |   |                 |   |          |
| 2                                                                                         | No                                                                  |                                                                                                                                                                                                                                                                                                                                                                          |                                                                                                                                                                                                                                       |   |                |      |            |                |          |   |                 |   |          |
| 27                                                                                        | revasc_type<br>Show the field ONLY if:<br>[revascularization] = '1' | Type of Revascularization                                                                                                                                                                                                                                                                                                                                                | checkbox<br><table border="1"> <tr><td>1</td><td>revasc_type__1</td><td>CABG</td></tr> <tr><td>2</td><td>revasc_type__2</td><td>PTCA</td></tr> </table>                                                                               | 1 | revasc_type__1 | CABG | 2          | revasc_type__2 | PTCA     |   |                 |   |          |
| 1                                                                                         | revasc_type__1                                                      | CABG                                                                                                                                                                                                                                                                                                                                                                     |                                                                                                                                                                                                                                       |   |                |      |            |                |          |   |                 |   |          |
| 2                                                                                         | revasc_type__2                                                      | PTCA                                                                                                                                                                                                                                                                                                                                                                     |                                                                                                                                                                                                                                       |   |                |      |            |                |          |   |                 |   |          |

|    |                                                         |                                                                 |                                                                                                                                                                                                                                                                                                                                                                                                                                                     |   |                |                |    |                |                   |   |                |             |   |                |                                                                 |   |                |                           |
|----|---------------------------------------------------------|-----------------------------------------------------------------|-----------------------------------------------------------------------------------------------------------------------------------------------------------------------------------------------------------------------------------------------------------------------------------------------------------------------------------------------------------------------------------------------------------------------------------------------------|---|----------------|----------------|----|----------------|-------------------|---|----------------|-------------|---|----------------|-----------------------------------------------------------------|---|----------------|---------------------------|
| 28 | htn                                                     | Hypertension                                                    | radio, Required<br><table border="1"> <tr> <td>1</td> <td>Yes</td> </tr> <tr> <td>2</td> <td>No</td> </tr> </table>                                                                                                                                                                                                                                                                                                                                 | 1 | Yes            | 2              | No |                |                   |   |                |             |   |                |                                                                 |   |                |                           |
| 1  | Yes                                                     |                                                                 |                                                                                                                                                                                                                                                                                                                                                                                                                                                     |   |                |                |    |                |                   |   |                |             |   |                |                                                                 |   |                |                           |
| 2  | No                                                      |                                                                 |                                                                                                                                                                                                                                                                                                                                                                                                                                                     |   |                |                |    |                |                   |   |                |             |   |                |                                                                 |   |                |                           |
| 29 | diabetes                                                | Diabetes                                                        | radio, Required<br><table border="1"> <tr> <td>1</td> <td>Yes</td> </tr> <tr> <td>2</td> <td>No</td> </tr> </table>                                                                                                                                                                                                                                                                                                                                 | 1 | Yes            | 2              | No |                |                   |   |                |             |   |                |                                                                 |   |                |                           |
| 1  | Yes                                                     |                                                                 |                                                                                                                                                                                                                                                                                                                                                                                                                                                     |   |                |                |    |                |                   |   |                |             |   |                |                                                                 |   |                |                           |
| 2  | No                                                      |                                                                 |                                                                                                                                                                                                                                                                                                                                                                                                                                                     |   |                |                |    |                |                   |   |                |             |   |                |                                                                 |   |                |                           |
| 30 | af                                                      | Atrial Fibrillation                                             | radio, Required<br><table border="1"> <tr> <td>1</td> <td>Yes</td> </tr> <tr> <td>2</td> <td>No</td> </tr> </table>                                                                                                                                                                                                                                                                                                                                 | 1 | Yes            | 2              | No |                |                   |   |                |             |   |                |                                                                 |   |                |                           |
| 1  | Yes                                                     |                                                                 |                                                                                                                                                                                                                                                                                                                                                                                                                                                     |   |                |                |    |                |                   |   |                |             |   |                |                                                                 |   |                |                           |
| 2  | No                                                      |                                                                 |                                                                                                                                                                                                                                                                                                                                                                                                                                                     |   |                |                |    |                |                   |   |                |             |   |                |                                                                 |   |                |                           |
| 31 | cva                                                     | History of Stroke                                               | radio, Required<br><table border="1"> <tr> <td>1</td> <td>Yes</td> </tr> <tr> <td>2</td> <td>No</td> </tr> </table>                                                                                                                                                                                                                                                                                                                                 | 1 | Yes            | 2              | No |                |                   |   |                |             |   |                |                                                                 |   |                |                           |
| 1  | Yes                                                     |                                                                 |                                                                                                                                                                                                                                                                                                                                                                                                                                                     |   |                |                |    |                |                   |   |                |             |   |                |                                                                 |   |                |                           |
| 2  | No                                                      |                                                                 |                                                                                                                                                                                                                                                                                                                                                                                                                                                     |   |                |                |    |                |                   |   |                |             |   |                |                                                                 |   |                |                           |
| 32 | aa_usage                                                | Use Anti-arrhythmic Drugs                                       | radio, Required<br><table border="1"> <tr> <td>1</td> <td>Yes</td> </tr> <tr> <td>2</td> <td>No</td> </tr> </table>                                                                                                                                                                                                                                                                                                                                 | 1 | Yes            | 2              | No |                |                   |   |                |             |   |                |                                                                 |   |                |                           |
| 1  | Yes                                                     |                                                                 |                                                                                                                                                                                                                                                                                                                                                                                                                                                     |   |                |                |    |                |                   |   |                |             |   |                |                                                                 |   |                |                           |
| 2  | No                                                      |                                                                 |                                                                                                                                                                                                                                                                                                                                                                                                                                                     |   |                |                |    |                |                   |   |                |             |   |                |                                                                 |   |                |                           |
| 33 | type_of_aad<br>Show the field ONLY if: [aa_usage] = '1' | Type of AAD                                                     | checkbox<br><table border="1"> <tr> <td>1</td> <td>type_of_aad__1</td> <td>Amiodarone</td> </tr> <tr> <td>2</td> <td>type_of_aad__2</td> <td>Dronedarone</td> </tr> <tr> <td>4</td> <td>type_of_aad__4</td> <td>Propafenone</td> </tr> <tr> <td>6</td> <td>type_of_aad__6</td> <td>Sotalol</td> </tr> <tr> <td>5</td> <td>type_of_aad__5</td> <td>Other</td> </tr> </table>                                                                         | 1 | type_of_aad__1 | Amiodarone     | 2  | type_of_aad__2 | Dronedarone       | 4 | type_of_aad__4 | Propafenone | 6 | type_of_aad__6 | Sotalol                                                         | 5 | type_of_aad__5 | Other                     |
| 1  | type_of_aad__1                                          | Amiodarone                                                      |                                                                                                                                                                                                                                                                                                                                                                                                                                                     |   |                |                |    |                |                   |   |                |             |   |                |                                                                 |   |                |                           |
| 2  | type_of_aad__2                                          | Dronedarone                                                     |                                                                                                                                                                                                                                                                                                                                                                                                                                                     |   |                |                |    |                |                   |   |                |             |   |                |                                                                 |   |                |                           |
| 4  | type_of_aad__4                                          | Propafenone                                                     |                                                                                                                                                                                                                                                                                                                                                                                                                                                     |   |                |                |    |                |                   |   |                |             |   |                |                                                                 |   |                |                           |
| 6  | type_of_aad__6                                          | Sotalol                                                         |                                                                                                                                                                                                                                                                                                                                                                                                                                                     |   |                |                |    |                |                   |   |                |             |   |                |                                                                 |   |                |                           |
| 5  | type_of_aad__5                                          | Other                                                           |                                                                                                                                                                                                                                                                                                                                                                                                                                                     |   |                |                |    |                |                   |   |                |             |   |                |                                                                 |   |                |                           |
| 34 | bb_usage                                                | Use Beta Blockers                                               | radio, Required<br><table border="1"> <tr> <td>1</td> <td>Yes</td> </tr> <tr> <td>2</td> <td>No</td> </tr> </table>                                                                                                                                                                                                                                                                                                                                 | 1 | Yes            | 2              | No |                |                   |   |                |             |   |                |                                                                 |   |                |                           |
| 1  | Yes                                                     |                                                                 |                                                                                                                                                                                                                                                                                                                                                                                                                                                     |   |                |                |    |                |                   |   |                |             |   |                |                                                                 |   |                |                           |
| 2  | No                                                      |                                                                 |                                                                                                                                                                                                                                                                                                                                                                                                                                                     |   |                |                |    |                |                   |   |                |             |   |                |                                                                 |   |                |                           |
| 35 | ace_arb                                                 | RAAS Modifying Medications                                      | checkbox, Required<br><table border="1"> <tr> <td>1</td> <td>ace_arb__1</td> <td>No medications</td> </tr> <tr> <td>2</td> <td>ace_arb__2</td> <td>ACE inhibitor use</td> </tr> <tr> <td>3</td> <td>ace_arb__3</td> <td>ARB use</td> </tr> <tr> <td>4</td> <td>ace_arb__4</td> <td>ARNI (Angiotensin II Receptor Blocker Nephilysin Inhibitor) use</td> </tr> <tr> <td>5</td> <td>ace_arb__5</td> <td>Aldosterone Inhibitor Use</td> </tr> </table> | 1 | ace_arb__1     | No medications | 2  | ace_arb__2     | ACE inhibitor use | 3 | ace_arb__3     | ARB use     | 4 | ace_arb__4     | ARNI (Angiotensin II Receptor Blocker Nephilysin Inhibitor) use | 5 | ace_arb__5     | Aldosterone Inhibitor Use |
| 1  | ace_arb__1                                              | No medications                                                  |                                                                                                                                                                                                                                                                                                                                                                                                                                                     |   |                |                |    |                |                   |   |                |             |   |                |                                                                 |   |                |                           |
| 2  | ace_arb__2                                              | ACE inhibitor use                                               |                                                                                                                                                                                                                                                                                                                                                                                                                                                     |   |                |                |    |                |                   |   |                |             |   |                |                                                                 |   |                |                           |
| 3  | ace_arb__3                                              | ARB use                                                         |                                                                                                                                                                                                                                                                                                                                                                                                                                                     |   |                |                |    |                |                   |   |                |             |   |                |                                                                 |   |                |                           |
| 4  | ace_arb__4                                              | ARNI (Angiotensin II Receptor Blocker Nephilysin Inhibitor) use |                                                                                                                                                                                                                                                                                                                                                                                                                                                     |   |                |                |    |                |                   |   |                |             |   |                |                                                                 |   |                |                           |
| 5  | ace_arb__5                                              | Aldosterone Inhibitor Use                                       |                                                                                                                                                                                                                                                                                                                                                                                                                                                     |   |                |                |    |                |                   |   |                |             |   |                |                                                                 |   |                |                           |
| 36 | ccbs                                                    | Use Calcium Channel Blockers                                    | radio, Required<br><table border="1"> <tr> <td>1</td> <td>Yes</td> </tr> <tr> <td>2</td> <td>No</td> </tr> </table>                                                                                                                                                                                                                                                                                                                                 | 1 | Yes            | 2              | No |                |                   |   |                |             |   |                |                                                                 |   |                |                           |
| 1  | Yes                                                     |                                                                 |                                                                                                                                                                                                                                                                                                                                                                                                                                                     |   |                |                |    |                |                   |   |                |             |   |                |                                                                 |   |                |                           |
| 2  | No                                                      |                                                                 |                                                                                                                                                                                                                                                                                                                                                                                                                                                     |   |                |                |    |                |                   |   |                |             |   |                |                                                                 |   |                |                           |

|                                                          |                                            |                                                                                                                                 |                                                                                                                                                                                                                                                                                                                                                                                                                                                      |   |                    |   |                      |   |          |   |        |   |        |   |        |   |        |   |        |   |        |    |        |    |       |
|----------------------------------------------------------|--------------------------------------------|---------------------------------------------------------------------------------------------------------------------------------|------------------------------------------------------------------------------------------------------------------------------------------------------------------------------------------------------------------------------------------------------------------------------------------------------------------------------------------------------------------------------------------------------------------------------------------------------|---|--------------------|---|----------------------|---|----------|---|--------|---|--------|---|--------|---|--------|---|--------|---|--------|----|--------|----|-------|
| 37                                                       | bun                                        | BUN (mg/dL)                                                                                                                     | text (integer, Min: 0, Max: 99), Required                                                                                                                                                                                                                                                                                                                                                                                                            |   |                    |   |                      |   |          |   |        |   |        |   |        |   |        |   |        |   |        |    |        |    |       |
| 38                                                       | cr                                         | Creatinine (mg/dL)                                                                                                              | text (number_2dp, Min: 0, Max: 10), Required                                                                                                                                                                                                                                                                                                                                                                                                         |   |                    |   |                      |   |          |   |        |   |        |   |        |   |        |   |        |   |        |    |        |    |       |
| 39                                                       | nyha                                       | Baseline NYHA (New York Heart Association) Class                                                                                | radio, Required<br><table border="1"> <tr><td>1</td><td>I</td></tr> <tr><td>2</td><td>II</td></tr> <tr><td>3</td><td>III</td></tr> <tr><td>4</td><td>IV</td></tr> </table>                                                                                                                                                                                                                                                                           | 1 | I                  | 2 | II                   | 3 | III      | 4 | IV     |   |        |   |        |   |        |   |        |   |        |    |        |    |       |
| 1                                                        | I                                          |                                                                                                                                 |                                                                                                                                                                                                                                                                                                                                                                                                                                                      |   |                    |   |                      |   |          |   |        |   |        |   |        |   |        |   |        |   |        |    |        |    |       |
| 2                                                        | II                                         |                                                                                                                                 |                                                                                                                                                                                                                                                                                                                                                                                                                                                      |   |                    |   |                      |   |          |   |        |   |        |   |        |   |        |   |        |   |        |    |        |    |       |
| 3                                                        | III                                        |                                                                                                                                 |                                                                                                                                                                                                                                                                                                                                                                                                                                                      |   |                    |   |                      |   |          |   |        |   |        |   |        |   |        |   |        |   |        |    |        |    |       |
| 4                                                        | IV                                         |                                                                                                                                 |                                                                                                                                                                                                                                                                                                                                                                                                                                                      |   |                    |   |                      |   |          |   |        |   |        |   |        |   |        |   |        |   |        |    |        |    |       |
| 40                                                       | lvef                                       | Baseline LVEF                                                                                                                   | radio, Required<br><table border="1"> <tr><td>1</td><td>&gt;55%</td></tr> <tr><td>2</td><td>50-55%</td></tr> <tr><td>3</td><td>45-50%</td></tr> <tr><td>4</td><td>40-45%</td></tr> <tr><td>5</td><td>35-40%</td></tr> <tr><td>6</td><td>30-35%</td></tr> <tr><td>7</td><td>25-30%</td></tr> <tr><td>8</td><td>20-25%</td></tr> <tr><td>9</td><td>15-20%</td></tr> <tr><td>10</td><td>10-15%</td></tr> <tr><td>11</td><td>&lt; 10%</td></tr> </table> | 1 | >55%               | 2 | 50-55%               | 3 | 45-50%   | 4 | 40-45% | 5 | 35-40% | 6 | 30-35% | 7 | 25-30% | 8 | 20-25% | 9 | 15-20% | 10 | 10-15% | 11 | < 10% |
| 1                                                        | >55%                                       |                                                                                                                                 |                                                                                                                                                                                                                                                                                                                                                                                                                                                      |   |                    |   |                      |   |          |   |        |   |        |   |        |   |        |   |        |   |        |    |        |    |       |
| 2                                                        | 50-55%                                     |                                                                                                                                 |                                                                                                                                                                                                                                                                                                                                                                                                                                                      |   |                    |   |                      |   |          |   |        |   |        |   |        |   |        |   |        |   |        |    |        |    |       |
| 3                                                        | 45-50%                                     |                                                                                                                                 |                                                                                                                                                                                                                                                                                                                                                                                                                                                      |   |                    |   |                      |   |          |   |        |   |        |   |        |   |        |   |        |   |        |    |        |    |       |
| 4                                                        | 40-45%                                     |                                                                                                                                 |                                                                                                                                                                                                                                                                                                                                                                                                                                                      |   |                    |   |                      |   |          |   |        |   |        |   |        |   |        |   |        |   |        |    |        |    |       |
| 5                                                        | 35-40%                                     |                                                                                                                                 |                                                                                                                                                                                                                                                                                                                                                                                                                                                      |   |                    |   |                      |   |          |   |        |   |        |   |        |   |        |   |        |   |        |    |        |    |       |
| 6                                                        | 30-35%                                     |                                                                                                                                 |                                                                                                                                                                                                                                                                                                                                                                                                                                                      |   |                    |   |                      |   |          |   |        |   |        |   |        |   |        |   |        |   |        |    |        |    |       |
| 7                                                        | 25-30%                                     |                                                                                                                                 |                                                                                                                                                                                                                                                                                                                                                                                                                                                      |   |                    |   |                      |   |          |   |        |   |        |   |        |   |        |   |        |   |        |    |        |    |       |
| 8                                                        | 20-25%                                     |                                                                                                                                 |                                                                                                                                                                                                                                                                                                                                                                                                                                                      |   |                    |   |                      |   |          |   |        |   |        |   |        |   |        |   |        |   |        |    |        |    |       |
| 9                                                        | 15-20%                                     |                                                                                                                                 |                                                                                                                                                                                                                                                                                                                                                                                                                                                      |   |                    |   |                      |   |          |   |        |   |        |   |        |   |        |   |        |   |        |    |        |    |       |
| 10                                                       | 10-15%                                     |                                                                                                                                 |                                                                                                                                                                                                                                                                                                                                                                                                                                                      |   |                    |   |                      |   |          |   |        |   |        |   |        |   |        |   |        |   |        |    |        |    |       |
| 11                                                       | < 10%                                      |                                                                                                                                 |                                                                                                                                                                                                                                                                                                                                                                                                                                                      |   |                    |   |                      |   |          |   |        |   |        |   |        |   |        |   |        |   |        |    |        |    |       |
| 41                                                       | exact_lvef                                 | Exact LVEF (if known)                                                                                                           | text (number, Min: 0, Max: 100)<br>Custom alignment: RH                                                                                                                                                                                                                                                                                                                                                                                              |   |                    |   |                      |   |          |   |        |   |        |   |        |   |        |   |        |   |        |    |        |    |       |
| 42                                                       | echo_date                                  | Date of Echocardiogram                                                                                                          | text (date_mdy), Required                                                                                                                                                                                                                                                                                                                                                                                                                            |   |                    |   |                      |   |          |   |        |   |        |   |        |   |        |   |        |   |        |    |        |    |       |
| 43                                                       | baseline_clinical_data_preimplant_complete | Section Header: <i>Form Status</i><br>Complete?                                                                                 | dropdown<br><table border="1"> <tr><td>0</td><td>Incomplete</td></tr> <tr><td>1</td><td>Unverified</td></tr> <tr><td>2</td><td>Complete</td></tr> </table>                                                                                                                                                                                                                                                                                           | 0 | Incomplete         | 1 | Unverified           | 2 | Complete |   |        |   |        |   |        |   |        |   |        |   |        |    |        |    |       |
| 0                                                        | Incomplete                                 |                                                                                                                                 |                                                                                                                                                                                                                                                                                                                                                                                                                                                      |   |                    |   |                      |   |          |   |        |   |        |   |        |   |        |   |        |   |        |    |        |    |       |
| 1                                                        | Unverified                                 |                                                                                                                                 |                                                                                                                                                                                                                                                                                                                                                                                                                                                      |   |                    |   |                      |   |          |   |        |   |        |   |        |   |        |   |        |   |        |    |        |    |       |
| 2                                                        | Complete                                   |                                                                                                                                 |                                                                                                                                                                                                                                                                                                                                                                                                                                                      |   |                    |   |                      |   |          |   |        |   |        |   |        |   |        |   |        |   |        |    |        |    |       |
| Instrument: <b>Implantation Data</b> (implantation_data) |                                            |                                                                                                                                 |                                                                                                                                                                                                                                                                                                                                                                                                                                                      |   |                    |   |                      |   |          |   |        |   |        |   |        |   |        |   |        |   |        |    |        |    |       |
| 44                                                       | indication                                 | Section Header: <i>Device Data</i><br>ICD/CRT-D Indication<br><i>Subject screen fails if indicated for secondary prevention</i> | radio, Required<br><table border="1"> <tr><td>1</td><td>Primary Prevention</td></tr> <tr><td>2</td><td>Secondary Prevention</td></tr> </table>                                                                                                                                                                                                                                                                                                       | 1 | Primary Prevention | 2 | Secondary Prevention |   |          |   |        |   |        |   |        |   |        |   |        |   |        |    |        |    |       |
| 1                                                        | Primary Prevention                         |                                                                                                                                 |                                                                                                                                                                                                                                                                                                                                                                                                                                                      |   |                    |   |                      |   |          |   |        |   |        |   |        |   |        |   |        |   |        |    |        |    |       |
| 2                                                        | Secondary Prevention                       |                                                                                                                                 |                                                                                                                                                                                                                                                                                                                                                                                                                                                      |   |                    |   |                      |   |          |   |        |   |        |   |        |   |        |   |        |   |        |    |        |    |       |
| 45                                                       | pre_ecg_date                               | Date of Baseline (pre-implant) 12-Lead ECG                                                                                      | text (date_mdy), Required                                                                                                                                                                                                                                                                                                                                                                                                                            |   |                    |   |                      |   |          |   |        |   |        |   |        |   |        |   |        |   |        |    |        |    |       |
| 46                                                       | implant_date                               | Date of ICD/CRT-D Implant                                                                                                       | text (date_mdy), Required                                                                                                                                                                                                                                                                                                                                                                                                                            |   |                    |   |                      |   |          |   |        |   |        |   |        |   |        |   |        |   |        |    |        |    |       |

|    |                                                                  |                                                                                                                         |                                                                                                                                                                                                              |   |                |   |                   |   |           |   |                |
|----|------------------------------------------------------------------|-------------------------------------------------------------------------------------------------------------------------|--------------------------------------------------------------------------------------------------------------------------------------------------------------------------------------------------------------|---|----------------|---|-------------------|---|-----------|---|----------------|
| 47 | icd_type                                                         | ICD Type                                                                                                                | radio, Required<br><table border="1"> <tr><td>1</td><td>Single-chamber</td></tr> <tr><td>2</td><td>Dual-chamber</td></tr> <tr><td>3</td><td>CRT-D</td></tr> <tr><td>4</td><td>S-ICD</td></tr> </table>       | 1 | Single-chamber | 2 | Dual-chamber      | 3 | CRT-D     | 4 | S-ICD          |
| 1  | Single-chamber                                                   |                                                                                                                         |                                                                                                                                                                                                              |   |                |   |                   |   |           |   |                |
| 2  | Dual-chamber                                                     |                                                                                                                         |                                                                                                                                                                                                              |   |                |   |                   |   |           |   |                |
| 3  | CRT-D                                                            |                                                                                                                         |                                                                                                                                                                                                              |   |                |   |                   |   |           |   |                |
| 4  | S-ICD                                                            |                                                                                                                         |                                                                                                                                                                                                              |   |                |   |                   |   |           |   |                |
| 48 | lead_positioning<br>Show the field ONLY if:<br>[icd_type] = '3'  | LV Lead Positioning                                                                                                     | radio<br><table border="1"> <tr><td>1</td><td>Apical</td></tr> <tr><td>2</td><td>Mid</td></tr> <tr><td>3</td><td>Basal</td></tr> </table>                                                                    | 1 | Apical         | 2 | Mid               | 3 | Basal     |   |                |
| 1  | Apical                                                           |                                                                                                                         |                                                                                                                                                                                                              |   |                |   |                   |   |           |   |                |
| 2  | Mid                                                              |                                                                                                                         |                                                                                                                                                                                                              |   |                |   |                   |   |           |   |                |
| 3  | Basal                                                            |                                                                                                                         |                                                                                                                                                                                                              |   |                |   |                   |   |           |   |                |
| 49 | lead_postioning<br>Show the field ONLY if:<br>[icd_type] = '3'   | LV Lead Positioning                                                                                                     | radio<br><table border="1"> <tr><td>1</td><td>Anterior</td></tr> <tr><td>2</td><td>Anterolateral</td></tr> <tr><td>3</td><td>Posterior</td></tr> <tr><td>4</td><td>Posterolateral</td></tr> </table>         | 1 | Anterior       | 2 | Anterolateral     | 3 | Posterior | 4 | Posterolateral |
| 1  | Anterior                                                         |                                                                                                                         |                                                                                                                                                                                                              |   |                |   |                   |   |           |   |                |
| 2  | Anterolateral                                                    |                                                                                                                         |                                                                                                                                                                                                              |   |                |   |                   |   |           |   |                |
| 3  | Posterior                                                        |                                                                                                                         |                                                                                                                                                                                                              |   |                |   |                   |   |           |   |                |
| 4  | Posterolateral                                                   |                                                                                                                         |                                                                                                                                                                                                              |   |                |   |                   |   |           |   |                |
| 50 | manufacturer                                                     | Device Manufacturer                                                                                                     | radio, Required<br><table border="1"> <tr><td>1</td><td>Medtronic</td></tr> <tr><td>2</td><td>Boston Scientific</td></tr> <tr><td>3</td><td>St Jude</td></tr> <tr><td>4</td><td>Biotronik</td></tr> </table> | 1 | Medtronic      | 2 | Boston Scientific | 3 | St Jude   | 4 | Biotronik      |
| 1  | Medtronic                                                        |                                                                                                                         |                                                                                                                                                                                                              |   |                |   |                   |   |           |   |                |
| 2  | Boston Scientific                                                |                                                                                                                         |                                                                                                                                                                                                              |   |                |   |                   |   |           |   |                |
| 3  | St Jude                                                          |                                                                                                                         |                                                                                                                                                                                                              |   |                |   |                   |   |           |   |                |
| 4  | Biotronik                                                        |                                                                                                                         |                                                                                                                                                                                                              |   |                |   |                   |   |           |   |                |
| 51 | model                                                            | Device Model                                                                                                            | text, Required                                                                                                                                                                                               |   |                |   |                   |   |           |   |                |
| 52 | vt_zone_option                                                   | VT Detection Zone Programmed?                                                                                           | radio, Required<br><table border="1"> <tr><td>1</td><td>Yes</td></tr> <tr><td>2</td><td>No</td></tr> </table>                                                                                                | 1 | Yes            | 2 | No                |   |           |   |                |
| 1  | Yes                                                              |                                                                                                                         |                                                                                                                                                                                                              |   |                |   |                   |   |           |   |                |
| 2  | No                                                               |                                                                                                                         |                                                                                                                                                                                                              |   |                |   |                   |   |           |   |                |
| 53 | atp                                                              | Device ATP Setting                                                                                                      | radio, Required<br><table border="1"> <tr><td>1</td><td>On</td></tr> <tr><td>2</td><td>Off</td></tr> </table>                                                                                                | 1 | On             | 2 | Off               |   |           |   |                |
| 1  | On                                                               |                                                                                                                         |                                                                                                                                                                                                              |   |                |   |                   |   |           |   |                |
| 2  | Off                                                              |                                                                                                                         |                                                                                                                                                                                                              |   |                |   |                   |   |           |   |                |
| 54 | vt_zone_bpm<br>Show the field ONLY if:<br>[vt_zone_option] = '1' | Device VT Zone (BPM)<br><i>Please list the lowest integer of the VT zone. E.g. if range is 188-200 bpm enter in 188</i> | text (integer, Min: 100, Max: 600)                                                                                                                                                                           |   |                |   |                   |   |           |   |                |
| 55 | vf_zone_bpm                                                      | Device VF Zone (BPM)<br><i>Please list the lowest integer of the VF zone. E.g. if range is 188-200 bpm enter in 188</i> | text (integer, Min: 100, Max: 600), Required                                                                                                                                                                 |   |                |   |                   |   |           |   |                |
| 56 | vt_zone_ms                                                       | Section Header: <i>If Milliseconds is Reported Instead</i><br>Device VT Interval (ms)                                   | text (integer, Min: 100, Max: 600)                                                                                                                                                                           |   |                |   |                   |   |           |   |                |
| 57 | vf_zone_ms                                                       | Device VF Interval (ms)                                                                                                 | text (integer, Min: 100, Max: 600)                                                                                                                                                                           |   |                |   |                   |   |           |   |                |

|    |                            |                                                                                                                                                                                                                           |                                                                                                                                                                     |   |            |   |            |   |          |
|----|----------------------------|---------------------------------------------------------------------------------------------------------------------------------------------------------------------------------------------------------------------------|---------------------------------------------------------------------------------------------------------------------------------------------------------------------|---|------------|---|------------|---|----------|
| 58 | initial_nid_vt             | Section Header: <i>If Programmed for Number of Intervals to Detect (NID)</i><br>Device NID for VT<br><i>Optional if listed on report</i>                                                                                  | text (integer, Min: 0, Max: 100)                                                                                                                                    |   |            |   |            |   |          |
| 59 | redect_nid_vt              | Device NID for Redetection VT<br><i>Optional if listed on report</i>                                                                                                                                                      | text (integer, Min: 0, Max: 100)                                                                                                                                    |   |            |   |            |   |          |
| 60 | nid_numerator              | Device NID VF Numerator<br><i>Optional if listed on report</i>                                                                                                                                                            | text (integer, Min: 0, Max: 100)                                                                                                                                    |   |            |   |            |   |          |
| 61 | nid_denominator            | Device NID VF Denominator<br><i>Optional if listed on report</i>                                                                                                                                                          | text (integer, Min: 0, Max: 100)                                                                                                                                    |   |            |   |            |   |          |
| 62 | initial_time_vt            | Section Header: <i>If Programmed for Detection Duration</i><br>Example Initial Duration: 2.5 seconds Redetection Duration: 1.0 seconds<br>Device Initial Detection Duration for VT<br><i>Optional if listed on report</i> | text (number_1dp, Min: 0, Max: 99)                                                                                                                                  |   |            |   |            |   |          |
| 63 | redetection_time_vt        | Device Re-detection Duration for VT<br><i>Optional if listed on report</i>                                                                                                                                                | text (number_1dp, Min: 0, Max: 99)                                                                                                                                  |   |            |   |            |   |          |
| 64 | initial_time_vf            | Device Initial Detection Duration for VF<br><i>Optional if listed on report</i>                                                                                                                                           | text (number_1dp, Min: 0, Max: 99)                                                                                                                                  |   |            |   |            |   |          |
| 65 | redetection_time_vf        | Device Redetection Duration for VF<br><i>Optional if listed on report</i>                                                                                                                                                 | text (number_1dp, Min: 0, Max: 99)                                                                                                                                  |   |            |   |            |   |          |
| 66 | implantation_data_complete | Section Header: <i>Form Status</i><br>Complete?                                                                                                                                                                           | dropdown<br><table border="1"> <tr> <td>0</td> <td>Incomplete</td> </tr> <tr> <td>1</td> <td>Unverified</td> </tr> <tr> <td>2</td> <td>Complete</td> </tr> </table> | 0 | Incomplete | 1 | Unverified | 2 | Complete |
| 0  | Incomplete                 |                                                                                                                                                                                                                           |                                                                                                                                                                     |   |            |   |            |   |          |
| 1  | Unverified                 |                                                                                                                                                                                                                           |                                                                                                                                                                     |   |            |   |            |   |          |
| 2  | Complete                   |                                                                                                                                                                                                                           |                                                                                                                                                                     |   |            |   |            |   |          |

Instrument: **Events Status-Post Implant** (events\_statuspost\_implant)

|    |                                                         |                                                              |                                                                                                                     |   |     |   |    |
|----|---------------------------------------------------------|--------------------------------------------------------------|---------------------------------------------------------------------------------------------------------------------|---|-----|---|----|
| 67 | therapy                                                 | Section Header: <i>Events</i><br>Therapy During Device Life? | radio, Required<br><table border="1"> <tr> <td>1</td> <td>Yes</td> </tr> <tr> <td>2</td> <td>No</td> </tr> </table> | 1 | Yes | 2 | No |
| 1  | Yes                                                     |                                                              |                                                                                                                     |   |     |   |    |
| 2  | No                                                      |                                                              |                                                                                                                     |   |     |   |    |
| 68 | therapy_date<br>Show the field ONLY if: [therapy] = '1' | Date of Therapy                                              | text (date_mdy)                                                                                                     |   |     |   |    |
| 69 | a_pace<br>Show the field ONLY if: [therapy] = '1'       | % Atrial Pacing at Date of Therapy                           | text (number_1dp, Min: 0, Max: 100)                                                                                 |   |     |   |    |
| 70 | v_pace<br>Show the field ONLY if: [therapy] = '1'       | % Ventricular Pacing at Date of Therapy                      | text (number_1dp, Min: 0, Max: 100)                                                                                 |   |     |   |    |

|    |                                                                    |                                                                                                                                                        |                                                                                                                                                                            |   |                 |                |                                           |                 |          |
|----|--------------------------------------------------------------------|--------------------------------------------------------------------------------------------------------------------------------------------------------|----------------------------------------------------------------------------------------------------------------------------------------------------------------------------|---|-----------------|----------------|-------------------------------------------|-----------------|----------|
| 71 | lv_pace<br>Show the field ONLY if:<br>[therapy] = '1'              | % Left Ventricular Pacing at Date of Therapy                                                                                                           | text (number_1dp, Min: 0, Max: 100)                                                                                                                                        |   |                 |                |                                           |                 |          |
| 72 | charge_time_therapy<br>Show the field ONLY if:<br>[therapy] = '1'  | Charge Time at Date of Therapy<br>(seconds)                                                                                                            | text (number_1dp, Min: 0, Max: 100)                                                                                                                                        |   |                 |                |                                           |                 |          |
| 73 | therapy_type<br>Show the field ONLY if:<br>[therapy] = '1'         | Type of Therapy                                                                                                                                        | checkbox<br><table border="1"> <tr> <td>1</td> <td>therapy_type__1</td> <td>Shock (Joules)</td> </tr> <tr> <td>2</td> <td>therapy_type__2</td> <td>ATP</td> </tr> </table> | 1 | therapy_type__1 | Shock (Joules) | 2                                         | therapy_type__2 | ATP      |
| 1  | therapy_type__1                                                    | Shock (Joules)                                                                                                                                         |                                                                                                                                                                            |   |                 |                |                                           |                 |          |
| 2  | therapy_type__2                                                    | ATP                                                                                                                                                    |                                                                                                                                                                            |   |                 |                |                                           |                 |          |
| 74 | total_joules<br>Show the field ONLY if:<br>[therapy] = '1'         | Total Amount of Joules Delivered<br><i>Please calculate total amount of joules. E.g. if interrogation lists 41 J x 4, then enter 164 into this box</i> | text (integer, Min: 0, Max: 2000)                                                                                                                                          |   |                 |                |                                           |                 |          |
| 75 | shock_freq                                                         | Total Frequency of Shocks Delivered During Therapy<br><i>Do not include ATP in this sum</i>                                                            | text (integer, Min: 0, Max: 100)                                                                                                                                           |   |                 |                |                                           |                 |          |
| 76 | adjudication<br>Show the field ONLY if:<br>[therapy] = '1'         | Adjudication of Therapy                                                                                                                                | radio<br><table border="1"> <tr> <td>1</td> <td>Appropriate</td> </tr> <tr> <td>2</td> <td>Inappropriate</td> </tr> </table>                                               | 1 | Appropriate     | 2              | Inappropriate                             |                 |          |
| 1  | Appropriate                                                        |                                                                                                                                                        |                                                                                                                                                                            |   |                 |                |                                           |                 |          |
| 2  | Inappropriate                                                      |                                                                                                                                                        |                                                                                                                                                                            |   |                 |                |                                           |                 |          |
| 77 | change_after_therapy<br>Show the field ONLY if:<br>[therapy] = '1' | Programming Changes After Therapy                                                                                                                      | radio<br><table border="1"> <tr> <td>1</td> <td>Yes</td> </tr> <tr> <td>2</td> <td>No</td> </tr> </table>                                                                  | 1 | Yes             | 2              | No                                        |                 |          |
| 1  | Yes                                                                |                                                                                                                                                        |                                                                                                                                                                            |   |                 |                |                                           |                 |          |
| 2  | No                                                                 |                                                                                                                                                        |                                                                                                                                                                            |   |                 |                |                                           |                 |          |
| 78 | arrhythmia_type<br>Show the field ONLY if:<br>[adjudication] = '1' | Type of Ventricular Arrhythmia                                                                                                                         | radio<br><table border="1"> <tr> <td>1</td> <td>Monomorphic VT</td> </tr> <tr> <td>2</td> <td>Polymorphic VT / Ventricular Fibrillation</td> </tr> </table>                | 1 | Monomorphic VT  | 2              | Polymorphic VT / Ventricular Fibrillation |                 |          |
| 1  | Monomorphic VT                                                     |                                                                                                                                                        |                                                                                                                                                                            |   |                 |                |                                           |                 |          |
| 2  | Polymorphic VT / Ventricular Fibrillation                          |                                                                                                                                                        |                                                                                                                                                                            |   |                 |                |                                           |                 |          |
| 79 | cycle_length<br>Show the field ONLY if:<br>[adjudication] = '1'    | Average Cycle Length of Arrhythmia (ms)                                                                                                                | text (integer, Min: 0, Max: 1000)                                                                                                                                          |   |                 |                |                                           |                 |          |
| 80 | events_statuspost_implant_complete                                 | Section Header: <i>Form Status</i><br>Complete?                                                                                                        | dropdown<br><table border="1"> <tr> <td>0</td> <td>Incomplete</td> </tr> <tr> <td>1</td> <td>Unverified</td> </tr> <tr> <td>2</td> <td>Complete</td> </tr> </table>        | 0 | Incomplete      | 1              | Unverified                                | 2               | Complete |
| 0  | Incomplete                                                         |                                                                                                                                                        |                                                                                                                                                                            |   |                 |                |                                           |                 |          |
| 1  | Unverified                                                         |                                                                                                                                                        |                                                                                                                                                                            |   |                 |                |                                           |                 |          |
| 2  | Complete                                                           |                                                                                                                                                        |                                                                                                                                                                            |   |                 |                |                                           |                 |          |

Instrument: **Pre-Generator Change or Device Upgrade Clinical Data** (pregenerator\_change\_or\_device\_upgrade\_clinical\_dat)



|    |                                                                         |                                                                                                                                                                                                                                                                                                                                                                          |                                                                                                                                                                                                                                                                                                                                                                                       |   |                  |            |    |                  |             |   |                  |             |   |                  |         |   |                  |       |
|----|-------------------------------------------------------------------------|--------------------------------------------------------------------------------------------------------------------------------------------------------------------------------------------------------------------------------------------------------------------------------------------------------------------------------------------------------------------------|---------------------------------------------------------------------------------------------------------------------------------------------------------------------------------------------------------------------------------------------------------------------------------------------------------------------------------------------------------------------------------------|---|------------------|------------|----|------------------|-------------|---|------------------|-------------|---|------------------|---------|---|------------------|-------|
| 81 | mi_2                                                                    | Section Header: <i>Document clinical data to temporally agree with patient status at time before implant or generator change. E.g. If the patient has their first MI between de novo implant and generator change/upgrade, you would answer "No" for "History of MI" at the baseline clinical data timepoint and "Yes" during concordant timeframe.</i><br>History of MI | radio, Required<br><table border="1"> <tr> <td>1</td> <td>Yes</td> </tr> <tr> <td>2</td> <td>No</td> </tr> </table>                                                                                                                                                                                                                                                                   | 1 | Yes              | 2          | No |                  |             |   |                  |             |   |                  |         |   |                  |       |
| 1  | Yes                                                                     |                                                                                                                                                                                                                                                                                                                                                                          |                                                                                                                                                                                                                                                                                                                                                                                       |   |                  |            |    |                  |             |   |                  |             |   |                  |         |   |                  |       |
| 2  | No                                                                      |                                                                                                                                                                                                                                                                                                                                                                          |                                                                                                                                                                                                                                                                                                                                                                                       |   |                  |            |    |                  |             |   |                  |             |   |                  |         |   |                  |       |
| 82 | revascularization_2                                                     | History of Revascularization                                                                                                                                                                                                                                                                                                                                             | radio, Required<br><table border="1"> <tr> <td>1</td> <td>Yes</td> </tr> <tr> <td>2</td> <td>No</td> </tr> </table>                                                                                                                                                                                                                                                                   | 1 | Yes              | 2          | No |                  |             |   |                  |             |   |                  |         |   |                  |       |
| 1  | Yes                                                                     |                                                                                                                                                                                                                                                                                                                                                                          |                                                                                                                                                                                                                                                                                                                                                                                       |   |                  |            |    |                  |             |   |                  |             |   |                  |         |   |                  |       |
| 2  | No                                                                      |                                                                                                                                                                                                                                                                                                                                                                          |                                                                                                                                                                                                                                                                                                                                                                                       |   |                  |            |    |                  |             |   |                  |             |   |                  |         |   |                  |       |
| 83 | revasc_type_2<br>Show the field ONLY if:<br>[revascularization_2] = '1' | Type of Revascularization                                                                                                                                                                                                                                                                                                                                                | checkbox<br><table border="1"> <tr> <td>1</td> <td>revasc_type_2__1</td> <td>CABG</td> </tr> <tr> <td>2</td> <td>revasc_type_2__2</td> <td>PTCA</td> </tr> </table>                                                                                                                                                                                                                   | 1 | revasc_type_2__1 | CABG       | 2  | revasc_type_2__2 | PTCA        |   |                  |             |   |                  |         |   |                  |       |
| 1  | revasc_type_2__1                                                        | CABG                                                                                                                                                                                                                                                                                                                                                                     |                                                                                                                                                                                                                                                                                                                                                                                       |   |                  |            |    |                  |             |   |                  |             |   |                  |         |   |                  |       |
| 2  | revasc_type_2__2                                                        | PTCA                                                                                                                                                                                                                                                                                                                                                                     |                                                                                                                                                                                                                                                                                                                                                                                       |   |                  |            |    |                  |             |   |                  |             |   |                  |         |   |                  |       |
| 84 | htn_2                                                                   | Hypertension                                                                                                                                                                                                                                                                                                                                                             | radio, Required<br><table border="1"> <tr> <td>1</td> <td>Yes</td> </tr> <tr> <td>2</td> <td>No</td> </tr> </table>                                                                                                                                                                                                                                                                   | 1 | Yes              | 2          | No |                  |             |   |                  |             |   |                  |         |   |                  |       |
| 1  | Yes                                                                     |                                                                                                                                                                                                                                                                                                                                                                          |                                                                                                                                                                                                                                                                                                                                                                                       |   |                  |            |    |                  |             |   |                  |             |   |                  |         |   |                  |       |
| 2  | No                                                                      |                                                                                                                                                                                                                                                                                                                                                                          |                                                                                                                                                                                                                                                                                                                                                                                       |   |                  |            |    |                  |             |   |                  |             |   |                  |         |   |                  |       |
| 85 | diabetes_2                                                              | Diabetes                                                                                                                                                                                                                                                                                                                                                                 | radio, Required<br><table border="1"> <tr> <td>1</td> <td>Yes</td> </tr> <tr> <td>2</td> <td>No</td> </tr> </table>                                                                                                                                                                                                                                                                   | 1 | Yes              | 2          | No |                  |             |   |                  |             |   |                  |         |   |                  |       |
| 1  | Yes                                                                     |                                                                                                                                                                                                                                                                                                                                                                          |                                                                                                                                                                                                                                                                                                                                                                                       |   |                  |            |    |                  |             |   |                  |             |   |                  |         |   |                  |       |
| 2  | No                                                                      |                                                                                                                                                                                                                                                                                                                                                                          |                                                                                                                                                                                                                                                                                                                                                                                       |   |                  |            |    |                  |             |   |                  |             |   |                  |         |   |                  |       |
| 86 | af_2                                                                    | Atrial Fibrillation                                                                                                                                                                                                                                                                                                                                                      | radio, Required<br><table border="1"> <tr> <td>1</td> <td>Yes</td> </tr> <tr> <td>2</td> <td>No</td> </tr> </table>                                                                                                                                                                                                                                                                   | 1 | Yes              | 2          | No |                  |             |   |                  |             |   |                  |         |   |                  |       |
| 1  | Yes                                                                     |                                                                                                                                                                                                                                                                                                                                                                          |                                                                                                                                                                                                                                                                                                                                                                                       |   |                  |            |    |                  |             |   |                  |             |   |                  |         |   |                  |       |
| 2  | No                                                                      |                                                                                                                                                                                                                                                                                                                                                                          |                                                                                                                                                                                                                                                                                                                                                                                       |   |                  |            |    |                  |             |   |                  |             |   |                  |         |   |                  |       |
| 87 | cva_2                                                                   | History of Stroke                                                                                                                                                                                                                                                                                                                                                        | radio, Required<br><table border="1"> <tr> <td>1</td> <td>Yes</td> </tr> <tr> <td>2</td> <td>No</td> </tr> </table>                                                                                                                                                                                                                                                                   | 1 | Yes              | 2          | No |                  |             |   |                  |             |   |                  |         |   |                  |       |
| 1  | Yes                                                                     |                                                                                                                                                                                                                                                                                                                                                                          |                                                                                                                                                                                                                                                                                                                                                                                       |   |                  |            |    |                  |             |   |                  |             |   |                  |         |   |                  |       |
| 2  | No                                                                      |                                                                                                                                                                                                                                                                                                                                                                          |                                                                                                                                                                                                                                                                                                                                                                                       |   |                  |            |    |                  |             |   |                  |             |   |                  |         |   |                  |       |
| 88 | aa_usage_2                                                              | Use Anti-arrhythmic Drugs                                                                                                                                                                                                                                                                                                                                                | radio, Required<br><table border="1"> <tr> <td>1</td> <td>Yes</td> </tr> <tr> <td>2</td> <td>No</td> </tr> </table>                                                                                                                                                                                                                                                                   | 1 | Yes              | 2          | No |                  |             |   |                  |             |   |                  |         |   |                  |       |
| 1  | Yes                                                                     |                                                                                                                                                                                                                                                                                                                                                                          |                                                                                                                                                                                                                                                                                                                                                                                       |   |                  |            |    |                  |             |   |                  |             |   |                  |         |   |                  |       |
| 2  | No                                                                      |                                                                                                                                                                                                                                                                                                                                                                          |                                                                                                                                                                                                                                                                                                                                                                                       |   |                  |            |    |                  |             |   |                  |             |   |                  |         |   |                  |       |
| 89 | type_of_aad_2<br>Show the field ONLY if:<br>[aa_usage_2] = '1'          | Type of AAD                                                                                                                                                                                                                                                                                                                                                              | checkbox<br><table border="1"> <tr> <td>1</td> <td>type_of_aad_2__1</td> <td>Amiodarone</td> </tr> <tr> <td>2</td> <td>type_of_aad_2__2</td> <td>Dronedarone</td> </tr> <tr> <td>4</td> <td>type_of_aad_2__4</td> <td>Propafenone</td> </tr> <tr> <td>6</td> <td>type_of_aad_2__6</td> <td>Sotalol</td> </tr> <tr> <td>5</td> <td>type_of_aad_2__5</td> <td>Other</td> </tr> </table> | 1 | type_of_aad_2__1 | Amiodarone | 2  | type_of_aad_2__2 | Dronedarone | 4 | type_of_aad_2__4 | Propafenone | 6 | type_of_aad_2__6 | Sotalol | 5 | type_of_aad_2__5 | Other |
| 1  | type_of_aad_2__1                                                        | Amiodarone                                                                                                                                                                                                                                                                                                                                                               |                                                                                                                                                                                                                                                                                                                                                                                       |   |                  |            |    |                  |             |   |                  |             |   |                  |         |   |                  |       |
| 2  | type_of_aad_2__2                                                        | Dronedarone                                                                                                                                                                                                                                                                                                                                                              |                                                                                                                                                                                                                                                                                                                                                                                       |   |                  |            |    |                  |             |   |                  |             |   |                  |         |   |                  |       |
| 4  | type_of_aad_2__4                                                        | Propafenone                                                                                                                                                                                                                                                                                                                                                              |                                                                                                                                                                                                                                                                                                                                                                                       |   |                  |            |    |                  |             |   |                  |             |   |                  |         |   |                  |       |
| 6  | type_of_aad_2__6                                                        | Sotalol                                                                                                                                                                                                                                                                                                                                                                  |                                                                                                                                                                                                                                                                                                                                                                                       |   |                  |            |    |                  |             |   |                  |             |   |                  |         |   |                  |       |
| 5  | type_of_aad_2__5                                                        | Other                                                                                                                                                                                                                                                                                                                                                                    |                                                                                                                                                                                                                                                                                                                                                                                       |   |                  |            |    |                  |             |   |                  |             |   |                  |         |   |                  |       |

|    |              |                                                                           |                                                                                                                                                                                                                                                                                                                                                                                                                                                                                       |   |              |                |        |              |                   |   |              |         |        |              |                                                                 |   |              |                           |        |   |        |    |        |    |       |
|----|--------------|---------------------------------------------------------------------------|---------------------------------------------------------------------------------------------------------------------------------------------------------------------------------------------------------------------------------------------------------------------------------------------------------------------------------------------------------------------------------------------------------------------------------------------------------------------------------------|---|--------------|----------------|--------|--------------|-------------------|---|--------------|---------|--------|--------------|-----------------------------------------------------------------|---|--------------|---------------------------|--------|---|--------|----|--------|----|-------|
| 90 | bb_usage_2   | Use Beta Blockers                                                         | radio, Required<br><table border="1"> <tr> <td>1</td> <td>Yes</td> </tr> <tr> <td>2</td> <td>No</td> </tr> </table>                                                                                                                                                                                                                                                                                                                                                                   | 1 | Yes          | 2              | No     |              |                   |   |              |         |        |              |                                                                 |   |              |                           |        |   |        |    |        |    |       |
| 1  | Yes          |                                                                           |                                                                                                                                                                                                                                                                                                                                                                                                                                                                                       |   |              |                |        |              |                   |   |              |         |        |              |                                                                 |   |              |                           |        |   |        |    |        |    |       |
| 2  | No           |                                                                           |                                                                                                                                                                                                                                                                                                                                                                                                                                                                                       |   |              |                |        |              |                   |   |              |         |        |              |                                                                 |   |              |                           |        |   |        |    |        |    |       |
| 91 | ace_arb_2    | RAAS Modifying Medications                                                | checkbox, Required<br><table border="1"> <tr> <td>1</td> <td>ace_arb_2__1</td> <td>No medications</td> </tr> <tr> <td>2</td> <td>ace_arb_2__2</td> <td>ACE inhibitor use</td> </tr> <tr> <td>3</td> <td>ace_arb_2__3</td> <td>ARB use</td> </tr> <tr> <td>4</td> <td>ace_arb_2__4</td> <td>ARNI (Angiotensin II Receptor Blocker Neprilysin Inhibitor) use</td> </tr> <tr> <td>5</td> <td>ace_arb_2__5</td> <td>Aldosterone Inhibitor Use</td> </tr> </table>                         | 1 | ace_arb_2__1 | No medications | 2      | ace_arb_2__2 | ACE inhibitor use | 3 | ace_arb_2__3 | ARB use | 4      | ace_arb_2__4 | ARNI (Angiotensin II Receptor Blocker Neprilysin Inhibitor) use | 5 | ace_arb_2__5 | Aldosterone Inhibitor Use |        |   |        |    |        |    |       |
| 1  | ace_arb_2__1 | No medications                                                            |                                                                                                                                                                                                                                                                                                                                                                                                                                                                                       |   |              |                |        |              |                   |   |              |         |        |              |                                                                 |   |              |                           |        |   |        |    |        |    |       |
| 2  | ace_arb_2__2 | ACE inhibitor use                                                         |                                                                                                                                                                                                                                                                                                                                                                                                                                                                                       |   |              |                |        |              |                   |   |              |         |        |              |                                                                 |   |              |                           |        |   |        |    |        |    |       |
| 3  | ace_arb_2__3 | ARB use                                                                   |                                                                                                                                                                                                                                                                                                                                                                                                                                                                                       |   |              |                |        |              |                   |   |              |         |        |              |                                                                 |   |              |                           |        |   |        |    |        |    |       |
| 4  | ace_arb_2__4 | ARNI (Angiotensin II Receptor Blocker Neprilysin Inhibitor) use           |                                                                                                                                                                                                                                                                                                                                                                                                                                                                                       |   |              |                |        |              |                   |   |              |         |        |              |                                                                 |   |              |                           |        |   |        |    |        |    |       |
| 5  | ace_arb_2__5 | Aldosterone Inhibitor Use                                                 |                                                                                                                                                                                                                                                                                                                                                                                                                                                                                       |   |              |                |        |              |                   |   |              |         |        |              |                                                                 |   |              |                           |        |   |        |    |        |    |       |
| 92 | ccbs_2       | Use Calcium Channel Blockers                                              | radio, Required<br><table border="1"> <tr> <td>1</td> <td>Yes</td> </tr> <tr> <td>2</td> <td>No</td> </tr> </table>                                                                                                                                                                                                                                                                                                                                                                   | 1 | Yes          | 2              | No     |              |                   |   |              |         |        |              |                                                                 |   |              |                           |        |   |        |    |        |    |       |
| 1  | Yes          |                                                                           |                                                                                                                                                                                                                                                                                                                                                                                                                                                                                       |   |              |                |        |              |                   |   |              |         |        |              |                                                                 |   |              |                           |        |   |        |    |        |    |       |
| 2  | No           |                                                                           |                                                                                                                                                                                                                                                                                                                                                                                                                                                                                       |   |              |                |        |              |                   |   |              |         |        |              |                                                                 |   |              |                           |        |   |        |    |        |    |       |
| 93 | bun_2        | BUN (mg/dL)                                                               | text (integer, Min: 0, Max: 99), Required                                                                                                                                                                                                                                                                                                                                                                                                                                             |   |              |                |        |              |                   |   |              |         |        |              |                                                                 |   |              |                           |        |   |        |    |        |    |       |
| 94 | cr_2         | Creatinine (mg/dL)                                                        | text (number_2dp, Min: 0, Max: 10), Required                                                                                                                                                                                                                                                                                                                                                                                                                                          |   |              |                |        |              |                   |   |              |         |        |              |                                                                 |   |              |                           |        |   |        |    |        |    |       |
| 95 | nyha_2       | NYHA (New York Heart Association) Class Prior to Generator Change/Upgrade | radio, Required<br><table border="1"> <tr> <td>1</td> <td>I</td> </tr> <tr> <td>2</td> <td>II</td> </tr> <tr> <td>3</td> <td>III</td> </tr> <tr> <td>4</td> <td>IV</td> </tr> </table>                                                                                                                                                                                                                                                                                                | 1 | I            | 2              | II     | 3            | III               | 4 | IV           |         |        |              |                                                                 |   |              |                           |        |   |        |    |        |    |       |
| 1  | I            |                                                                           |                                                                                                                                                                                                                                                                                                                                                                                                                                                                                       |   |              |                |        |              |                   |   |              |         |        |              |                                                                 |   |              |                           |        |   |        |    |        |    |       |
| 2  | II           |                                                                           |                                                                                                                                                                                                                                                                                                                                                                                                                                                                                       |   |              |                |        |              |                   |   |              |         |        |              |                                                                 |   |              |                           |        |   |        |    |        |    |       |
| 3  | III          |                                                                           |                                                                                                                                                                                                                                                                                                                                                                                                                                                                                       |   |              |                |        |              |                   |   |              |         |        |              |                                                                 |   |              |                           |        |   |        |    |        |    |       |
| 4  | IV           |                                                                           |                                                                                                                                                                                                                                                                                                                                                                                                                                                                                       |   |              |                |        |              |                   |   |              |         |        |              |                                                                 |   |              |                           |        |   |        |    |        |    |       |
| 96 | lvef_2       | LVEF Prior to Generator Change/Upgrade                                    | radio, Required<br><table border="1"> <tr> <td>1</td> <td>&gt;55%</td> </tr> <tr> <td>2</td> <td>50-55%</td> </tr> <tr> <td>3</td> <td>45-50%</td> </tr> <tr> <td>4</td> <td>40-45%</td> </tr> <tr> <td>5</td> <td>35-40%</td> </tr> <tr> <td>6</td> <td>30-35%</td> </tr> <tr> <td>7</td> <td>25-30%</td> </tr> <tr> <td>8</td> <td>20-25%</td> </tr> <tr> <td>9</td> <td>15-20%</td> </tr> <tr> <td>10</td> <td>10-15%</td> </tr> <tr> <td>11</td> <td>&lt; 10%</td> </tr> </table> | 1 | >55%         | 2              | 50-55% | 3            | 45-50%            | 4 | 40-45%       | 5       | 35-40% | 6            | 30-35%                                                          | 7 | 25-30%       | 8                         | 20-25% | 9 | 15-20% | 10 | 10-15% | 11 | < 10% |
| 1  | >55%         |                                                                           |                                                                                                                                                                                                                                                                                                                                                                                                                                                                                       |   |              |                |        |              |                   |   |              |         |        |              |                                                                 |   |              |                           |        |   |        |    |        |    |       |
| 2  | 50-55%       |                                                                           |                                                                                                                                                                                                                                                                                                                                                                                                                                                                                       |   |              |                |        |              |                   |   |              |         |        |              |                                                                 |   |              |                           |        |   |        |    |        |    |       |
| 3  | 45-50%       |                                                                           |                                                                                                                                                                                                                                                                                                                                                                                                                                                                                       |   |              |                |        |              |                   |   |              |         |        |              |                                                                 |   |              |                           |        |   |        |    |        |    |       |
| 4  | 40-45%       |                                                                           |                                                                                                                                                                                                                                                                                                                                                                                                                                                                                       |   |              |                |        |              |                   |   |              |         |        |              |                                                                 |   |              |                           |        |   |        |    |        |    |       |
| 5  | 35-40%       |                                                                           |                                                                                                                                                                                                                                                                                                                                                                                                                                                                                       |   |              |                |        |              |                   |   |              |         |        |              |                                                                 |   |              |                           |        |   |        |    |        |    |       |
| 6  | 30-35%       |                                                                           |                                                                                                                                                                                                                                                                                                                                                                                                                                                                                       |   |              |                |        |              |                   |   |              |         |        |              |                                                                 |   |              |                           |        |   |        |    |        |    |       |
| 7  | 25-30%       |                                                                           |                                                                                                                                                                                                                                                                                                                                                                                                                                                                                       |   |              |                |        |              |                   |   |              |         |        |              |                                                                 |   |              |                           |        |   |        |    |        |    |       |
| 8  | 20-25%       |                                                                           |                                                                                                                                                                                                                                                                                                                                                                                                                                                                                       |   |              |                |        |              |                   |   |              |         |        |              |                                                                 |   |              |                           |        |   |        |    |        |    |       |
| 9  | 15-20%       |                                                                           |                                                                                                                                                                                                                                                                                                                                                                                                                                                                                       |   |              |                |        |              |                   |   |              |         |        |              |                                                                 |   |              |                           |        |   |        |    |        |    |       |
| 10 | 10-15%       |                                                                           |                                                                                                                                                                                                                                                                                                                                                                                                                                                                                       |   |              |                |        |              |                   |   |              |         |        |              |                                                                 |   |              |                           |        |   |        |    |        |    |       |
| 11 | < 10%        |                                                                           |                                                                                                                                                                                                                                                                                                                                                                                                                                                                                       |   |              |                |        |              |                   |   |              |         |        |              |                                                                 |   |              |                           |        |   |        |    |        |    |       |
| 97 | exact_lvef_2 | Exact LVEF (if known - e.g. Biplane Simpson's Method)                     | text (number, Min: 0, Max: 100)<br>Custom alignment: RH                                                                                                                                                                                                                                                                                                                                                                                                                               |   |              |                |        |              |                   |   |              |         |        |              |                                                                 |   |              |                           |        |   |        |    |        |    |       |

|                                                                                            |                                                                     |                                                                                |                                                                                                                                                                                                                                                                          |   |                |   |                   |   |           |   |                |   |                        |
|--------------------------------------------------------------------------------------------|---------------------------------------------------------------------|--------------------------------------------------------------------------------|--------------------------------------------------------------------------------------------------------------------------------------------------------------------------------------------------------------------------------------------------------------------------|---|----------------|---|-------------------|---|-----------|---|----------------|---|------------------------|
| 98                                                                                         | echo_date_2                                                         | Date of Echocardiogram                                                         | text (date_mdy), Required                                                                                                                                                                                                                                                |   |                |   |                   |   |           |   |                |   |                        |
| 99                                                                                         | pregenerator_change_or_device_upgrade_clinical_dat_complete         | Section Header: <i>Form Status</i><br>Complete?                                | dropdown<br><table border="1"> <tr> <td>0</td> <td>Incomplete</td> </tr> <tr> <td>1</td> <td>Unverified</td> </tr> <tr> <td>2</td> <td>Complete</td> </tr> </table>                                                                                                      | 0 | Incomplete     | 1 | Unverified        | 2 | Complete  |   |                |   |                        |
| 0                                                                                          | Incomplete                                                          |                                                                                |                                                                                                                                                                                                                                                                          |   |                |   |                   |   |           |   |                |   |                        |
| 1                                                                                          | Unverified                                                          |                                                                                |                                                                                                                                                                                                                                                                          |   |                |   |                   |   |           |   |                |   |                        |
| 2                                                                                          | Complete                                                            |                                                                                |                                                                                                                                                                                                                                                                          |   |                |   |                   |   |           |   |                |   |                        |
| Instrument: <b>Generator Change or Device Upgrade</b> (generator_change_or_device_upgrade) |                                                                     |                                                                                |                                                                                                                                                                                                                                                                          |   |                |   |                   |   |           |   |                |   |                        |
| 100                                                                                        | pre_gen_12_lead                                                     | Section Header: <i>Device Data</i><br>Date of Pre-Generator Change 12-Lead ECG | text (date_mdy), Required                                                                                                                                                                                                                                                |   |                |   |                   |   |           |   |                |   |                        |
| 101                                                                                        | date_of_change                                                      | Date of Generator Change or Upgrade                                            | text (date_mdy), Required                                                                                                                                                                                                                                                |   |                |   |                   |   |           |   |                |   |                        |
| 102                                                                                        | icd_type_2                                                          | ICD Type                                                                       | radio, Required<br><table border="1"> <tr> <td>1</td> <td>Single-chamber</td> </tr> <tr> <td>2</td> <td>Dual-chamber</td> </tr> <tr> <td>3</td> <td>CRT-D</td> </tr> <tr> <td>4</td> <td>S-ICD</td> </tr> <tr> <td>5</td> <td>Downgrade to Pacemaker</td> </tr> </table> | 1 | Single-chamber | 2 | Dual-chamber      | 3 | CRT-D     | 4 | S-ICD          | 5 | Downgrade to Pacemaker |
| 1                                                                                          | Single-chamber                                                      |                                                                                |                                                                                                                                                                                                                                                                          |   |                |   |                   |   |           |   |                |   |                        |
| 2                                                                                          | Dual-chamber                                                        |                                                                                |                                                                                                                                                                                                                                                                          |   |                |   |                   |   |           |   |                |   |                        |
| 3                                                                                          | CRT-D                                                               |                                                                                |                                                                                                                                                                                                                                                                          |   |                |   |                   |   |           |   |                |   |                        |
| 4                                                                                          | S-ICD                                                               |                                                                                |                                                                                                                                                                                                                                                                          |   |                |   |                   |   |           |   |                |   |                        |
| 5                                                                                          | Downgrade to Pacemaker                                              |                                                                                |                                                                                                                                                                                                                                                                          |   |                |   |                   |   |           |   |                |   |                        |
| 103                                                                                        | lead_positioning_2<br>Show the field ONLY if:<br>[icd_type_2] = '3' | LV Lead Positioning                                                            | radio<br><table border="1"> <tr> <td>1</td> <td>Apical</td> </tr> <tr> <td>2</td> <td>Mid</td> </tr> <tr> <td>3</td> <td>Basal</td> </tr> </table>                                                                                                                       | 1 | Apical         | 2 | Mid               | 3 | Basal     |   |                |   |                        |
| 1                                                                                          | Apical                                                              |                                                                                |                                                                                                                                                                                                                                                                          |   |                |   |                   |   |           |   |                |   |                        |
| 2                                                                                          | Mid                                                                 |                                                                                |                                                                                                                                                                                                                                                                          |   |                |   |                   |   |           |   |                |   |                        |
| 3                                                                                          | Basal                                                               |                                                                                |                                                                                                                                                                                                                                                                          |   |                |   |                   |   |           |   |                |   |                        |
| 104                                                                                        | lead_postioning_2<br>Show the field ONLY if:<br>[icd_type_2] = '3'  | LV Lead Positioning                                                            | radio<br><table border="1"> <tr> <td>1</td> <td>Anterior</td> </tr> <tr> <td>2</td> <td>Anterolateral</td> </tr> <tr> <td>3</td> <td>Posterior</td> </tr> <tr> <td>4</td> <td>Posterolateral</td> </tr> </table>                                                         | 1 | Anterior       | 2 | Anterolateral     | 3 | Posterior | 4 | Posterolateral |   |                        |
| 1                                                                                          | Anterior                                                            |                                                                                |                                                                                                                                                                                                                                                                          |   |                |   |                   |   |           |   |                |   |                        |
| 2                                                                                          | Anterolateral                                                       |                                                                                |                                                                                                                                                                                                                                                                          |   |                |   |                   |   |           |   |                |   |                        |
| 3                                                                                          | Posterior                                                           |                                                                                |                                                                                                                                                                                                                                                                          |   |                |   |                   |   |           |   |                |   |                        |
| 4                                                                                          | Posterolateral                                                      |                                                                                |                                                                                                                                                                                                                                                                          |   |                |   |                   |   |           |   |                |   |                        |
| 105                                                                                        | manufacturer_2                                                      | Device Manufacturer                                                            | radio, Required<br><table border="1"> <tr> <td>1</td> <td>Medtronic</td> </tr> <tr> <td>2</td> <td>Boston Scientific</td> </tr> <tr> <td>3</td> <td>St Jude</td> </tr> <tr> <td>4</td> <td>Biotronik</td> </tr> </table>                                                 | 1 | Medtronic      | 2 | Boston Scientific | 3 | St Jude   | 4 | Biotronik      |   |                        |
| 1                                                                                          | Medtronic                                                           |                                                                                |                                                                                                                                                                                                                                                                          |   |                |   |                   |   |           |   |                |   |                        |
| 2                                                                                          | Boston Scientific                                                   |                                                                                |                                                                                                                                                                                                                                                                          |   |                |   |                   |   |           |   |                |   |                        |
| 3                                                                                          | St Jude                                                             |                                                                                |                                                                                                                                                                                                                                                                          |   |                |   |                   |   |           |   |                |   |                        |
| 4                                                                                          | Biotronik                                                           |                                                                                |                                                                                                                                                                                                                                                                          |   |                |   |                   |   |           |   |                |   |                        |
| 106                                                                                        | model_2                                                             | Device Model                                                                   | text, Required                                                                                                                                                                                                                                                           |   |                |   |                   |   |           |   |                |   |                        |
| 107                                                                                        | vt_zone_option_2                                                    | VT Detection Zone Programmed?                                                  | radio, Required<br><table border="1"> <tr> <td>1</td> <td>Yes</td> </tr> <tr> <td>2</td> <td>No</td> </tr> </table>                                                                                                                                                      | 1 | Yes            | 2 | No                |   |           |   |                |   |                        |
| 1                                                                                          | Yes                                                                 |                                                                                |                                                                                                                                                                                                                                                                          |   |                |   |                   |   |           |   |                |   |                        |
| 2                                                                                          | No                                                                  |                                                                                |                                                                                                                                                                                                                                                                          |   |                |   |                   |   |           |   |                |   |                        |

|                                                                                                                               |                                                                      |                                                                                                                                                                                                                                  |                                                                                                                                                                     |   |            |   |            |   |          |
|-------------------------------------------------------------------------------------------------------------------------------|----------------------------------------------------------------------|----------------------------------------------------------------------------------------------------------------------------------------------------------------------------------------------------------------------------------|---------------------------------------------------------------------------------------------------------------------------------------------------------------------|---|------------|---|------------|---|----------|
| 108                                                                                                                           | atp_2                                                                | Device ATP Setting                                                                                                                                                                                                               | radio, Required<br><table border="1"> <tr> <td>1</td> <td>On</td> </tr> <tr> <td>2</td> <td>Off</td> </tr> </table>                                                 | 1 | On         | 2 | Off        |   |          |
| 1                                                                                                                             | On                                                                   |                                                                                                                                                                                                                                  |                                                                                                                                                                     |   |            |   |            |   |          |
| 2                                                                                                                             | Off                                                                  |                                                                                                                                                                                                                                  |                                                                                                                                                                     |   |            |   |            |   |          |
| 109                                                                                                                           | vt_zone_bpm_2<br>Show the field ONLY if:<br>[vt_zone_option_2] = '1' | Device VT Zone (BPM)<br><i>Please list the lowest integer of the VT zone. E.g. if range is 188-200 bpm enter in 188</i>                                                                                                          | text (integer, Min: 100, Max: 600)                                                                                                                                  |   |            |   |            |   |          |
| 110                                                                                                                           | vf_zone_bpm_2                                                        | Device VF Zone (BPM)<br><i>Please list the lowest integer of the VF zone. E.g. if range is 188-200 bpm enter in 188</i>                                                                                                          | text (integer, Min: 100, Max: 600), Required                                                                                                                        |   |            |   |            |   |          |
| 111                                                                                                                           | vt_zone_ms_2                                                         | Section Header: <i>If Milliseconds is Reported Instead</i><br>Device VT Interval (ms)                                                                                                                                            | text (integer, Min: 100, Max: 600)                                                                                                                                  |   |            |   |            |   |          |
| 112                                                                                                                           | vf_zone_ms_2                                                         | Device VF Interval (ms)                                                                                                                                                                                                          | text (integer, Min: 100, Max: 600)                                                                                                                                  |   |            |   |            |   |          |
| 113                                                                                                                           | initial_nid_vt_2                                                     | Section Header: <i>If Programmed for Number of Intervals to Detect (NID)</i><br>Device NID for VT<br><i>Optional if listed on report</i>                                                                                         | text (integer, Min: 0, Max: 100)                                                                                                                                    |   |            |   |            |   |          |
| 114                                                                                                                           | redect_nid_vt_2                                                      | Device NID for Redetection VT<br><i>Optional if listed on report</i>                                                                                                                                                             | text (integer, Min: 0, Max: 100)                                                                                                                                    |   |            |   |            |   |          |
| 115                                                                                                                           | nid_numerator_2                                                      | Device NID VF Numerator<br><i>Optional if listed on report</i>                                                                                                                                                                   | text (integer, Min: 0, Max: 100)                                                                                                                                    |   |            |   |            |   |          |
| 116                                                                                                                           | nid_denominator_2                                                    | Device NID VF Denominator<br><i>Optional if listed on report</i>                                                                                                                                                                 | text (integer, Min: 0, Max: 100)                                                                                                                                    |   |            |   |            |   |          |
| 117                                                                                                                           | initial_time_vt_2                                                    | Section Header: <i>If Programmed for Detection Duration</i><br><i>Example Initial Duration: 2.5 seconds Redetection Duration: 1.0 seconds</i><br>Device Initial Detection Duration for VT<br><i>Optional if listed on report</i> | text (number_1dp, Min: 0, Max: 99)                                                                                                                                  |   |            |   |            |   |          |
| 118                                                                                                                           | redetection_time_vt_2                                                | Device Re-detection Duration for VT<br><i>Optional if listed on report</i>                                                                                                                                                       | text (number_1dp, Min: 0, Max: 99)                                                                                                                                  |   |            |   |            |   |          |
| 119                                                                                                                           | initial_time_vf_2                                                    | Device Initial Detection Duration for VF<br><i>Optional if listed on report</i>                                                                                                                                                  | text (number_1dp, Min: 0, Max: 99)                                                                                                                                  |   |            |   |            |   |          |
| 120                                                                                                                           | redetection_time_vf_2                                                | Device Redetection Duration for VF<br><i>Optional if listed on report</i>                                                                                                                                                        | text (number_1dp, Min: 0, Max: 99)                                                                                                                                  |   |            |   |            |   |          |
| 121                                                                                                                           | generator_change_or_device_upgrade_complete                          | Section Header: <i>Form Status</i><br>Complete?                                                                                                                                                                                  | dropdown<br><table border="1"> <tr> <td>0</td> <td>Incomplete</td> </tr> <tr> <td>1</td> <td>Unverified</td> </tr> <tr> <td>2</td> <td>Complete</td> </tr> </table> | 0 | Incomplete | 1 | Unverified | 2 | Complete |
| 0                                                                                                                             | Incomplete                                                           |                                                                                                                                                                                                                                  |                                                                                                                                                                     |   |            |   |            |   |          |
| 1                                                                                                                             | Unverified                                                           |                                                                                                                                                                                                                                  |                                                                                                                                                                     |   |            |   |            |   |          |
| 2                                                                                                                             | Complete                                                             |                                                                                                                                                                                                                                  |                                                                                                                                                                     |   |            |   |            |   |          |
| Instrument: <b>Events Status-Post Generator Change or Device Upgrade</b> (events_statuspost_generator_change_or_device_upgra) |                                                                      |                                                                                                                                                                                                                                  |                                                                                                                                                                     |   |            |   |            |   |          |

|     |                                                                       |                                                                                                                                                        |                                                                                                                                                                                |   |                   |                |               |                   |     |
|-----|-----------------------------------------------------------------------|--------------------------------------------------------------------------------------------------------------------------------------------------------|--------------------------------------------------------------------------------------------------------------------------------------------------------------------------------|---|-------------------|----------------|---------------|-------------------|-----|
| 122 | therapy_2                                                             | Section Header: <i>Events</i><br>Therapy During Device Life?                                                                                           | radio, Required<br><table border="1"> <tr> <td>1</td> <td>Yes</td> </tr> <tr> <td>2</td> <td>No</td> </tr> </table>                                                            | 1 | Yes               | 2              | No            |                   |     |
| 1   | Yes                                                                   |                                                                                                                                                        |                                                                                                                                                                                |   |                   |                |               |                   |     |
| 2   | No                                                                    |                                                                                                                                                        |                                                                                                                                                                                |   |                   |                |               |                   |     |
| 123 | therapy_date_2<br>Show the field ONLY if:<br>[therapy_2] = '1'        | Date of Therapy                                                                                                                                        | text (date_mdy)                                                                                                                                                                |   |                   |                |               |                   |     |
| 124 | a_pace_2<br>Show the field ONLY if:<br>[therapy_2] = '1'              | % Atrial Pacing at Date of Therapy                                                                                                                     | text (number_1dp, Min: 0, Max: 100)                                                                                                                                            |   |                   |                |               |                   |     |
| 125 | v_pace_2<br>Show the field ONLY if:<br>[therapy_2] = '1'              | % Ventricular Pacing at Date of Therapy                                                                                                                | text (number_1dp, Min: 0, Max: 100)                                                                                                                                            |   |                   |                |               |                   |     |
| 126 | lv_pace_2<br>Show the field ONLY if:<br>[therapy_2] = '1'             | % Left Ventricular Pacing at Date of Therapy                                                                                                           | text (number_1dp, Min: 0, Max: 100)                                                                                                                                            |   |                   |                |               |                   |     |
| 127 | charge_time_therapy_2<br>Show the field ONLY if:<br>[therapy_2] = '1' | Charge Time at Date of Therapy<br><i>seconds</i>                                                                                                       | text (number_1dp, Min: 0, Max: 100)                                                                                                                                            |   |                   |                |               |                   |     |
| 128 | therapy_type_2<br>Show the field ONLY if:<br>[therapy_2] = '1'        | Type of Therapy                                                                                                                                        | checkbox<br><table border="1"> <tr> <td>1</td> <td>therapy_type_2__1</td> <td>Shock (Joules)</td> </tr> <tr> <td>2</td> <td>therapy_type_2__2</td> <td>ATP</td> </tr> </table> | 1 | therapy_type_2__1 | Shock (Joules) | 2             | therapy_type_2__2 | ATP |
| 1   | therapy_type_2__1                                                     | Shock (Joules)                                                                                                                                         |                                                                                                                                                                                |   |                   |                |               |                   |     |
| 2   | therapy_type_2__2                                                     | ATP                                                                                                                                                    |                                                                                                                                                                                |   |                   |                |               |                   |     |
| 129 | total_joules_2<br>Show the field ONLY if:<br>[therapy_2] = '1'        | Total Amount of Joules Delivered<br><i>Please calculate total amount of joules. E.g. if interrogation lists 41 J x 4, then enter 164 into this box</i> | text (integer, Min: 0, Max: 2000)                                                                                                                                              |   |                   |                |               |                   |     |
| 130 | shock_freq_2<br>Show the field ONLY if:<br>[therapy_2] = '1'          | Total Frequency of Shocks Delivered During Therapy<br><i>Do not include ATP in this sum</i>                                                            | text (integer, Min: 0, Max: 100)                                                                                                                                               |   |                   |                |               |                   |     |
| 131 | adjudication_2<br>Show the field ONLY if:<br>[therapy_2] = '1'        | Adjudication of Therapy                                                                                                                                | radio<br><table border="1"> <tr> <td>1</td> <td>Appropriate</td> </tr> <tr> <td>2</td> <td>Inappropriate</td> </tr> </table>                                                   | 1 | Appropriate       | 2              | Inappropriate |                   |     |
| 1   | Appropriate                                                           |                                                                                                                                                        |                                                                                                                                                                                |   |                   |                |               |                   |     |
| 2   | Inappropriate                                                         |                                                                                                                                                        |                                                                                                                                                                                |   |                   |                |               |                   |     |

|     |                                                                        |                                                 |                                                                                                                                                                     |   |                |   |                                           |   |          |
|-----|------------------------------------------------------------------------|-------------------------------------------------|---------------------------------------------------------------------------------------------------------------------------------------------------------------------|---|----------------|---|-------------------------------------------|---|----------|
| 132 | change_after_therapy_2<br>Show the field ONLY if:<br>[therapy_2] = '1' | Programming Changes After Therapy               | radio<br><table border="1"> <tr> <td>1</td> <td>Yes</td> </tr> <tr> <td>2</td> <td>No</td> </tr> </table>                                                           | 1 | Yes            | 2 | No                                        |   |          |
| 1   | Yes                                                                    |                                                 |                                                                                                                                                                     |   |                |   |                                           |   |          |
| 2   | No                                                                     |                                                 |                                                                                                                                                                     |   |                |   |                                           |   |          |
| 133 | arrhythmia_type_2<br>Show the field ONLY if:<br>[adjudication_2] = '1' | Type of Ventricular Arrhythmia                  | radio<br><table border="1"> <tr> <td>1</td> <td>Monomorphic VT</td> </tr> <tr> <td>2</td> <td>Polymorphic VT / Ventricular Fibrillation</td> </tr> </table>         | 1 | Monomorphic VT | 2 | Polymorphic VT / Ventricular Fibrillation |   |          |
| 1   | Monomorphic VT                                                         |                                                 |                                                                                                                                                                     |   |                |   |                                           |   |          |
| 2   | Polymorphic VT / Ventricular Fibrillation                              |                                                 |                                                                                                                                                                     |   |                |   |                                           |   |          |
| 134 | cycle_length_2<br>Show the field ONLY if:<br>[adjudication_2] = '1'    | Average Cycle Length of Arrhythmia (ms)         | text (integer, Min: 0, Max: 1000)                                                                                                                                   |   |                |   |                                           |   |          |
| 135 | events_statuspost_generator_change_or_device_upgrade                   | Section Header: <i>Form Status</i><br>Complete? | dropdown<br><table border="1"> <tr> <td>0</td> <td>Incomplete</td> </tr> <tr> <td>1</td> <td>Unverified</td> </tr> <tr> <td>2</td> <td>Complete</td> </tr> </table> | 0 | Incomplete     | 1 | Unverified                                | 2 | Complete |
| 0   | Incomplete                                                             |                                                 |                                                                                                                                                                     |   |                |   |                                           |   |          |
| 1   | Unverified                                                             |                                                 |                                                                                                                                                                     |   |                |   |                                           |   |          |
| 2   | Complete                                                               |                                                 |                                                                                                                                                                     |   |                |   |                                           |   |          |
